# Supplementary material for: The impact of a disaster medicine clinical training program on medical students’ disaster literacy
Source: PeerJ. 2025 Jan 8;13:e18800. doi: 10.7717/peerj.18800 (PMC11724651; doi:10.7717/peerj.18800)
Supplement: Supplemental Information 4 [file peerj-13-18800-s004.xlsx]

## Sheet: PRE
ID	Doğum Yılınız	Öğrenci No:	Cinsiyetiniz	Afetzede oldunuz mu?	5PRE1_Deprem, sel, heyelan ve kazalar gibi doğa ve insan kaynaklı tehlikelerin nasıl oluştuğu ile ilgili bilgiye ulaşmak	5PRE2_Afetlerin insan, yapı ve çevreye vereceği zararların nasıl azaltılabileceği ile ilgili bilgiye ulaşmak	5PRE3_Sel, fırtına veya bir hortumda zarar görmekten kaçınmak için ihtiyacım olan bilgiye ulaşmak	5PRE4_Yaşadığım bölge ve coğrafyanın karşılaşabileceği tehlikelerin oluşturabileceği risklerin neler olduğu bilgisine ulaşmak	5PRE5_Afet öncesinde, afetlerde ortaya çıkan zararlara karşı yapılabilecek sigortalar hakkında bilgiye ulaşmak	5PRE6_Afet gönüllülerinin eğitimleriyle ilgili bilgilere ulaşmak	5PRE7_Evimi deprem, sel ve yangın gibi tehlikelere karşı yapısal olarak güçlendirmem gerektiğini anlamak	5PRE8_Bir yapının selden zarar görmesini engelleyebilmek için başka bir yere taşındırılma ihtiyacını anlamak	5PRE9_Afet öncesinde hazırlanan barınma yerlerinin önemli olduğunu anlamak	5PRE10_Sel gibi afetlerde suya yön vermek için kullanılan kum torbası gibi malzemelerin önemli olduğunu anlamak	5PRE11_Doğa kaynaklı bazı afetlerde kayıpları azaltmaya yönelik kullanılan erken uyarı sistemlerinin önemini anlamak	5PRE12_Çığ oluşumunu önlemeye karşı kar birikmesini engellemek için patlayıcı kullanma ihtiyacını anlamak	5PRE13_Afetlerle ilgili hangi eğitime ihtiyacım olduğuna karar vermek	5PRE14_Nerede olursa olsun erken uyarı sistemleri aktif hale geçtiğinde ne yapmam gerektiğine karar vermek	5PRE15_ Yaşadığım ortamda bulunan mobilya ve tablo gibi eşyaların afetler sırasında düşüp devrilerek verebileceği zararı nasıl azaltabileceğime karar vermek	5PRE16_Afetlere karşı risklerimi/oluşabilecek zararları azaltabilmek için, varsa uygun mali devlet desteğine başvurmak	5PRE17_Bir afet öncesinde çevremde ki çocuk, yaşlı, engelli veya yardıma ihtiyacı olan vatandaşları tespit etmek	5PRE18_Kurumların halka açık acil durum ve afet planlarına ulaşmak	5PRE19_Kurumların halka açık acil durum ve afet tatbikatları hakkındaki bilgilerine ulaşmak	5PRE20_ Afetlerle ilgili polis, ambulans ve itfaiye gibi ilk müdahale ekiplerinin aldığı eğitimlere ulaşmak	5PRE21_ Kurumların afetlerle ilgili halka açık genel hazırlık çalışmalarına ulaşmak	5PRE22_ Afet eğitimlerine neden ihtiyaç olduğunu anlamak	5PRE23_ Bir afet anında görevli kişilerin talimatlarına uyum göstermenin önemini anlamak	5PRE24_ Resmi kurumlar tarafından cep telefonlarına gönderilen afet mesajlarının önemini anlamak	5PRE25_ Benim ve çevremde ki nesnelerin uzun süreli sarsıntısından bir deprem olup olmadığını anlamak	5PRE26_ Afet öncesinde resmi kurumlar tarafından yapılan uyarı ve ikazların önemini anlamak	5PRE27_ Afetlere hazırlık amacıyla yapılan tatbikatlarda aile bireylerinin rol ve sorumluluklarının nasıl belirleneceğine karar vermek	5PRE28_ Afet çantasında neler olması gerektiğine karar vermek	5PRE29_ Afete neden olan tehlikelerle ilgili medyada yer alan bilgilerin güvenirliğini değerlendirmek	5PRE30_ Aile bireyleriyle aile afet planı hazırlamak	5PRE31_ Aile afet planı içerisinde hazırlanan tatbikat planlarını aile bireyleriyle uygulamak	5PRE32_ İlk yardım, yangın söndürme ve temel arama kurtarma eğitimlerine başvurmak	5PRE33_ Kurumlar tarafından tehlikeyle ilgili uyarı ve ikazlar afet vurmadan önce hemen yapılabilirse, alandan tahliye bilgisine ulaşmak	5PRE34_ Yerel kurumlar tarafından afet anında kullanılmak üzere park, bahçe gibi kamusal alanlara yerleştirilen afet ekipmanları bilgisine ulaşmak	5PRE35_ Toplumda sel veya fırtına gibi bir tehlikenin erken uyarısı yapıldığında afetten korunmak için gerekli bilgiye ulaşmak	5PRE36_ Bulunduğum ortamı terk edebileceğim bir kaçış planının ne kadar önemli olduğunu anlamak	5PRE37_ Kurumların ilaç ve tıbbi malzeme, gıda ve giysi gibi öğeler için oluşturdukları afet ekipman kitlerinin önemini anlamak	5PRE38_ Bir sel afeti öncesinde çevrenin sular altında kalmasını kum torbaları ile engelleyebilmenin önemli olduğunu anlamak	5PRE39_ Arama kurtarma çalışmalarında ilk 72 saatin önemli olduğunu anlamak	5PRE40_ Ambulans, itfaiye, emniyet veya diğer yardım ekiplerinin boş yere meşgul edilmemesi gerektiğini anlamak	5PRE41_ Bir afet anında ihtiyaç halinde hangi kurumla temasa geçebileceğime karar vermek	5PRE42_ Afet anında ikincil tehlikelerden korunmak için yapmam gerekenleri (bölgeyi terk etme veya bir aşı yaptırmak gibi) değerlendirmek	5PRE43_ Yaralanan bir kişinin ilk yardıma ihtiyacı olup olmadığına karar vermek	5PRE44_ Afet anında en yakın afet toplanma alanına gitmek	5PRE45_ Tahliye edilme talimatlarına uyum göstermek
44	1999	1809101001	Kadın	Hayır	5- Çok kolay	5- Çok kolay	5- Çok kolay	5- Çok kolay	4- Kolay	4- Kolay	3- Kararsızım	3- Kararsızım	4- Kolay	4- Kolay	4- Kolay	4- Kolay	3- Kararsızım	3- Kararsızım	4- Kolay	3- Kararsızım	3- Kararsızım	3- Kararsızım	3- Kararsızım	3- Kararsızım	3- Kararsızım	4- Kolay	5- Çok kolay	3- Kararsızım	2- Zor	3- Kararsızım	3- Kararsızım	3- Kararsızım	2- Zor	3- Kararsızım	3- Kararsızım	3- Kararsızım	3- Kararsızım	3- Kararsızım	3- Kararsızım	4- Kolay	4- Kolay	4- Kolay	4- Kolay	5- Çok kolay	3- Kararsızım	3- Kararsızım	3- Kararsızım	4- Kolay	4- Kolay
51	1999	1809101002	Erkek	Hayır	3- Kararsızım	2- Zor	2- Zor	3- Kararsızım	4- Kolay	2- Zor	2- Zor	4- Kolay	2- Zor	2- Zor	4- Kolay	4- Kolay	2- Zor	2- Zor	2- Zor	1- Çok zor	4- Kolay	3- Kararsızım	5- Çok kolay	2- Zor	4- Kolay	1- Çok zor	3- Kararsızım	5- Çok kolay	1- Çok zor	3- Kararsızım	2- Zor	3- Kararsızım	4- Kolay	4- Kolay	1- Çok zor	2- Zor	2- Zor	2- Zor	4- Kolay	5- Çok kolay	2- Zor	5- Çok kolay	1- Çok zor	4- Kolay	3- Kararsızım	3- Kararsızım	3- Kararsızım	1- Çok zor	2- Zor
52	2000	1809101003	Erkek	Evet	4- Kolay	3- Kararsızım	4- Kolay	4- Kolay	5- Çok kolay	4- Kolay	4- Kolay	3- Kararsızım	4- Kolay	4- Kolay	4- Kolay	4- Kolay	4- Kolay	4- Kolay	5- Çok kolay	4- Kolay	2- Zor	2- Zor	1- Çok zor	3- Kararsızım	4- Kolay	5- Çok kolay	5- Çok kolay	3- Kararsızım	4- Kolay	2- Zor	4- Kolay	4- Kolay	1- Çok zor	2- Zor	3- Kararsızım	2- Zor	4- Kolay	4- Kolay	4- Kolay	5- Çok kolay	4- Kolay	4- Kolay	4- Kolay	4- Kolay	4- Kolay	4- Kolay	4- Kolay	4- Kolay	4- Kolay
56	1999	1809101005	Kadın	Hayır	4- Kolay	4- Kolay	2- Zor	2- Zor	2- Zor	3- Kararsızım	4- Kolay	4- Kolay	5- Çok kolay	5- Çok kolay	5- Çok kolay	5- Çok kolay	4- Kolay	2- Zor	4- Kolay	2- Zor	2- Zor	1- Çok zor	1- Çok zor	3- Kararsızım	3- Kararsızım	5- Çok kolay	5- Çok kolay	5- Çok kolay	5- Çok kolay	5- Çok kolay	4- Kolay	5- Çok kolay	1- Çok zor	4- Kolay	2- Zor	4- Kolay	2- Zor	2- Zor	1- Çok zor	5- Çok kolay	4- Kolay	5- Çok kolay	5- Çok kolay	5- Çok kolay	1- Çok zor	5- Çok kolay	4- Kolay	1- Çok zor	2- Zor
53	1999	1809101006	Erkek	Evet	3- Kararsızım	2- Zor	1- Çok zor	3- Kararsızım	2- Zor	2- Zor	1- Çok zor	1- Çok zor	5- Çok kolay	3- Kararsızım	1- Çok zor	2- Zor	2- Zor	3- Kararsızım	4- Kolay	2- Zor	4- Kolay	3- Kararsızım	2- Zor	5- Çok kolay	3- Kararsızım	5- Çok kolay	4- Kolay	5- Çok kolay	2- Zor	5- Çok kolay	4- Kolay	3- Kararsızım	1- Çok zor	4- Kolay	4- Kolay	3- Kararsızım	4- Kolay	3- Kararsızım	4- Kolay	4- Kolay	4- Kolay	3- Kararsızım	5- Çok kolay	5- Çok kolay	5- Çok kolay	4- Kolay	5- Çok kolay	5- Çok kolay	5- Çok kolay
39	1999	1809101009	Erkek	Hayır	5- Çok kolay	5- Çok kolay	5- Çok kolay	5- Çok kolay	1- Çok zor	1- Çok zor	5- Çok kolay	5- Çok kolay	5- Çok kolay	5- Çok kolay	5- Çok kolay	5- Çok kolay	3- Kararsızım	3- Kararsızım	5- Çok kolay	1- Çok zor	1- Çok zor	1- Çok zor	1- Çok zor	1- Çok zor	1- Çok zor	5- Çok kolay	5- Çok kolay	5- Çok kolay	5- Çok kolay	5- Çok kolay	5- Çok kolay	5- Çok kolay	5- Çok kolay	2- Zor	1- Çok zor	2- Zor	1- Çok zor	1- Çok zor	4- Kolay	5- Çok kolay	5- Çok kolay	5- Çok kolay	5- Çok kolay	5- Çok kolay	5- Çok kolay	5- Çok kolay	5- Çok kolay	1- Çok zor	5- Çok kolay
36	1999	1809101014	Kadın	Evet	4- Kolay	3- Kararsızım	3- Kararsızım	3- Kararsızım	2- Zor	4- Kolay	4- Kolay	3- Kararsızım	4- Kolay	3- Kararsızım	4- Kolay	3- Kararsızım	4- Kolay	3- Kararsızım	4- Kolay	2- Zor	4- Kolay	3- Kararsızım	3- Kararsızım	3- Kararsızım	3- Kararsızım	3- Kararsızım	5- Çok kolay	3- Kararsızım	2- Zor	4- Kolay	3- Kararsızım	3- Kararsızım	2- Zor	4- Kolay	4- Kolay	5- Çok kolay	2- Zor	2- Zor	3- Kararsızım	4- Kolay	3- Kararsızım	3- Kararsızım	5- Çok kolay	5- Çok kolay	4- Kolay	4- Kolay	3- Kararsızım	4- Kolay	4- Kolay
50	2000	1809101022	Erkek	Hayır	5- Çok kolay	5- Çok kolay	5- Çok kolay	5- Çok kolay	1- Çok zor	5- Çok kolay	1- Çok zor	5- Çok kolay	1- Çok zor	1- Çok zor	5- Çok kolay	4- Kolay	1- Çok zor	3- Kararsızım	4- Kolay	1- Çok zor	4- Kolay	3- Kararsızım	3- Kararsızım	3- Kararsızım	3- Kararsızım	4- Kolay	3- Kararsızım	1- Çok zor	5- Çok kolay	1- Çok zor	3- Kararsızım	3- Kararsızım	3- Kararsızım	3- Kararsızım	3- Kararsızım	4- Kolay	4- Kolay	3- Kararsızım	3- Kararsızım	3- Kararsızım	3- Kararsızım	5- Çok kolay	1- Çok zor	5- Çok kolay	4- Kolay	4- Kolay	5- Çok kolay	3- Kararsızım	4- Kolay
41	1999	1809101023	Erkek	Hayır	4- Kolay	4- Kolay	4- Kolay	4- Kolay	3- Kararsızım	4- Kolay	5- Çok kolay	5- Çok kolay	5- Çok kolay	5- Çok kolay	5- Çok kolay	5- Çok kolay	4- Kolay	5- Çok kolay	3- Kararsızım	4- Kolay	5- Çok kolay	3- Kararsızım	3- Kararsızım	3- Kararsızım	3- Kararsızım	5- Çok kolay	5- Çok kolay	5- Çok kolay	5- Çok kolay	5- Çok kolay	5- Çok kolay	3- Kararsızım	2- Zor	3- Kararsızım	3- Kararsızım	5- Çok kolay	5- Çok kolay	3- Kararsızım	5- Çok kolay	5- Çok kolay	5- Çok kolay	5- Çok kolay	5- Çok kolay	5- Çok kolay	5- Çok kolay	4- Kolay	3- Kararsızım	5- Çok kolay	5- Çok kolay
48	2000	1809101026	Kadın	Hayır	4- Kolay	2- Zor	3- Kararsızım	2- Zor	1- Çok zor	2- Zor	3- Kararsızım	2- Zor	5- Çok kolay	5- Çok kolay	5- Çok kolay	4- Kolay	4- Kolay	3- Kararsızım	4- Kolay	3- Kararsızım	4- Kolay	2- Zor	2- Zor	2- Zor	2- Zor	5- Çok kolay	4- Kolay	3- Kararsızım	2- Zor	4- Kolay	2- Zor	4- Kolay	2- Zor	2- Zor	2- Zor	4- Kolay	2- Zor	2- Zor	2- Zor	5- Çok kolay	5- Çok kolay	5- Çok kolay	5- Çok kolay	5- Çok kolay	5- Çok kolay	4- Kolay	4- Kolay	3- Kararsızım	4- Kolay
55	2000	1809101028	Kadın	Hayır	5- Çok kolay	5- Çok kolay	5- Çok kolay	5- Çok kolay	4- Kolay	5- Çok kolay	5- Çok kolay	5- Çok kolay	5- Çok kolay	5- Çok kolay	5- Çok kolay	1- Çok zor	5- Çok kolay	5- Çok kolay	5- Çok kolay	1- Çok zor	1- Çok zor	1- Çok zor	1- Çok zor	5- Çok kolay	1- Çok zor	5- Çok kolay	5- Çok kolay	1- Çok zor	5- Çok kolay	5- Çok kolay	5- Çok kolay	5- Çok kolay	5- Çok kolay	5- Çok kolay	5- Çok kolay	5- Çok kolay	1- Çok zor	1- Çok zor	1- Çok zor	5- Çok kolay	5- Çok kolay	5- Çok kolay	5- Çok kolay	5- Çok kolay	5- Çok kolay	5- Çok kolay	3- Kararsızım	1- Çok zor	5- Çok kolay
43	2001	1809101029	Kadın	Evet	4- Kolay	4- Kolay	4- Kolay	4- Kolay	3- Kararsızım	3- Kararsızım	4- Kolay	4- Kolay	4- Kolay	3- Kararsızım	4- Kolay	3- Kararsızım	3- Kararsızım	4- Kolay	4- Kolay	3- Kararsızım	3- Kararsızım	3- Kararsızım	3- Kararsızım	3- Kararsızım	3- Kararsızım	4- Kolay	4- Kolay	4- Kolay	4- Kolay	4- Kolay	3- Kararsızım	3- Kararsızım	3- Kararsızım	3- Kararsızım	3- Kararsızım	3- Kararsızım	3- Kararsızım	3- Kararsızım	3- Kararsızım	4- Kolay	4- Kolay	3- Kararsızım	4- Kolay	4- Kolay	4- Kolay	4- Kolay	4- Kolay	3- Kararsızım	4- Kolay
47	2000	1809101031	Erkek	Hayır	5- Çok kolay	5- Çok kolay	5- Çok kolay	4- Kolay	3- Kararsızım	4- Kolay	3- Kararsızım	2- Zor	5- Çok kolay	4- Kolay	4- Kolay	2- Zor	4- Kolay	4- Kolay	5- Çok kolay	3- Kararsızım	4- Kolay	3- Kararsızım	3- Kararsızım	4- Kolay	3- Kararsızım	5- Çok kolay	4- Kolay	5- Çok kolay	5- Çok kolay	5- Çok kolay	5- Çok kolay	4- Kolay	2- Zor	4- Kolay	4- Kolay	4- Kolay	5- Çok kolay	4- Kolay	4- Kolay	5- Çok kolay	5- Çok kolay	5- Çok kolay	5- Çok kolay	5- Çok kolay	5- Çok kolay	4- Kolay	5- Çok kolay	5- Çok kolay	4- Kolay
46	2000	1809101032	Kadın	Hayır	4- Kolay	4- Kolay	2- Zor	3- Kararsızım	2- Zor	4- Kolay	4- Kolay	4- Kolay	5- Çok kolay	2- Zor	2- Zor	2- Zor	3- Kararsızım	2- Zor	4- Kolay	2- Zor	3- Kararsızım	3- Kararsızım	3- Kararsızım	3- Kararsızım	4- Kolay	5- Çok kolay	4- Kolay	5- Çok kolay	4- Kolay	4- Kolay	3- Kararsızım	4- Kolay	2- Zor	3- Kararsızım	2- Zor	3- Kararsızım	2- Zor	2- Zor	3- Kararsızım	4- Kolay	4- Kolay	4- Kolay	5- Çok kolay	5- Çok kolay	2- Zor	2- Zor	3- Kararsızım	3- Kararsızım	3- Kararsızım
35	2000	1809101037	Erkek	Hayır	4- Kolay	4- Kolay	4- Kolay	4- Kolay	4- Kolay	3- Kararsızım	3- Kararsızım	3- Kararsızım	3- Kararsızım	3- Kararsızım	3- Kararsızım	3- Kararsızım	3- Kararsızım	3- Kararsızım	3- Kararsızım	3- Kararsızım	3- Kararsızım	3- Kararsızım	4- Kolay	4- Kolay	3- Kararsızım	3- Kararsızım	4- Kolay	4- Kolay	4- Kolay	4- Kolay	3- Kararsızım	3- Kararsızım	4- Kolay	3- Kararsızım	4- Kolay	3- Kararsızım	4- Kolay	3- Kararsızım	4- Kolay	4- Kolay	3- Kararsızım	3- Kararsızım	4- Kolay	4- Kolay	4- Kolay	4- Kolay	3- Kararsızım	3- Kararsızım	3- Kararsızım
45	2000	1809101043	Erkek	Hayır	4- Kolay	4- Kolay	4- Kolay	3- Kararsızım	3- Kararsızım	4- Kolay	2- Zor	2- Zor	4- Kolay	4- Kolay	4- Kolay	3- Kararsızım	3- Kararsızım	3- Kararsızım	4- Kolay	4- Kolay	4- Kolay	3- Kararsızım	3- Kararsızım	3- Kararsızım	3- Kararsızım	4- Kolay	4- Kolay	4- Kolay	4- Kolay	4- Kolay	3- Kararsızım	4- Kolay	4- Kolay	4- Kolay	3- Kararsızım	3- Kararsızım	3- Kararsızım	3- Kararsızım	3- Kararsızım	4- Kolay	4- Kolay	4- Kolay	4- Kolay	4- Kolay	4- Kolay	4- Kolay	4- Kolay	4- Kolay	4- Kolay
37	2000	1809101044	Kadın	Hayır	4- Kolay	2- Zor	2- Zor	2- Zor	2- Zor	2- Zor	2- Zor	2- Zor	4- Kolay	4- Kolay	4- Kolay	3- Kararsızım	2- Zor	2- Zor	3- Kararsızım	3- Kararsızım	1- Çok zor	2- Zor	2- Zor	2- Zor	2- Zor	4- Kolay	4- Kolay	4- Kolay	4- Kolay	4- Kolay	3- Kararsızım	4- Kolay	3- Kararsızım	3- Kararsızım	3- Kararsızım	3- Kararsızım	2- Zor	2- Zor	2- Zor	4- Kolay	4- Kolay	4- Kolay	5- Çok kolay	5- Çok kolay	3- Kararsızım	3- Kararsızım	3- Kararsızım	3- Kararsızım	3- Kararsızım
40	2000	1809101046	Kadın	Hayır	2- Zor	2- Zor	2- Zor	2- Zor	1- Çok zor	1- Çok zor	5- Çok kolay	5- Çok kolay	5- Çok kolay	5- Çok kolay	5- Çok kolay	1- Çok zor	3- Kararsızım	3- Kararsızım	5- Çok kolay	1- Çok zor	1- Çok zor	1- Çok zor	1- Çok zor	1- Çok zor	1- Çok zor	5- Çok kolay	5- Çok kolay	5- Çok kolay	5- Çok kolay	5- Çok kolay	3- Kararsızım	3- Kararsızım	2- Zor	3- Kararsızım	3- Kararsızım	2- Zor	3- Kararsızım	1- Çok zor	3- Kararsızım	5- Çok kolay	5- Çok kolay	2- Zor	4- Kolay	5- Çok kolay	2- Zor	3- Kararsızım	4- Kolay	4- Kolay	4- Kolay
49	2000	1809101048	Kadın	Hayır	5- Çok kolay	5- Çok kolay	5- Çok kolay	5- Çok kolay	4- Kolay	4- Kolay	3- Kararsızım	5- Çok kolay	5- Çok kolay	5- Çok kolay	5- Çok kolay	5- Çok kolay	4- Kolay	3- Kararsızım	5- Çok kolay	2- Zor	2- Zor	4- Kolay	4- Kolay	4- Kolay	4- Kolay	5- Çok kolay	5- Çok kolay	5- Çok kolay	5- Çok kolay	5- Çok kolay	4- Kolay	2- Zor	4- Kolay	2- Zor	1- Çok zor	4- Kolay	4- Kolay	3- Kararsızım	4- Kolay	5- Çok kolay	5- Çok kolay	5- Çok kolay	5- Çok kolay	5- Çok kolay	3- Kararsızım	3- Kararsızım	3- Kararsızım	3- Kararsızım	4- Kolay
42	2000	1809101050	Erkek	Hayır	5- Çok kolay	4- Kolay	4- Kolay	4- Kolay	3- Kararsızım	3- Kararsızım	4- Kolay	4- Kolay	4- Kolay	4- Kolay	4- Kolay	3- Kararsızım	3- Kararsızım	3- Kararsızım	4- Kolay	1- Çok zor	3- Kararsızım	3- Kararsızım	3- Kararsızım	3- Kararsızım	3- Kararsızım	4- Kolay	4- Kolay	4- Kolay	5- Çok kolay	4- Kolay	3- Kararsızım	4- Kolay	3- Kararsızım	4- Kolay	3- Kararsızım	3- Kararsızım	3- Kararsızım	3- Kararsızım	3- Kararsızım	4- Kolay	4- Kolay	4- Kolay	4- Kolay	5- Çok kolay	3- Kararsızım	3- Kararsızım	3- Kararsızım	3- Kararsızım	5- Çok kolay
57	1999	1809101051	Erkek	Hayır	4- Kolay	4- Kolay	3- Kararsızım	3- Kararsızım	3- Kararsızım	3- Kararsızım	3- Kararsızım	4- Kolay	4- Kolay	3- Kararsızım	3- Kararsızım	3- Kararsızım	4- Kolay	3- Kararsızım	4- Kolay	3- Kararsızım	2- Zor	2- Zor	2- Zor	3- Kararsızım	2- Zor	4- Kolay	4- Kolay	3- Kararsızım	4- Kolay	3- Kararsızım	3- Kararsızım	4- Kolay	3- Kararsızım	4- Kolay	3- Kararsızım	3- Kararsızım	2- Zor	2- Zor	2- Zor	4- Kolay	3- Kararsızım	3- Kararsızım	4- Kolay	4- Kolay	3- Kararsızım	4- Kolay	3- Kararsızım	2- Zor	3- Kararsızım
54	2000	1809101054	Erkek	Hayır	4- Kolay	2- Zor	4- Kolay	2- Zor	1- Çok zor	3- Kararsızım	5- Çok kolay	5- Çok kolay	5- Çok kolay	4- Kolay	5- Çok kolay	4- Kolay	3- Kararsızım	3- Kararsızım	4- Kolay	3- Kararsızım	1- Çok zor	1- Çok zor	1- Çok zor	1- Çok zor	1- Çok zor	4- Kolay	4- Kolay	4- Kolay	4- Kolay	4- Kolay	3- Kararsızım	4- Kolay	1- Çok zor	1- Çok zor	1- Çok zor	2- Zor	2- Zor	1- Çok zor	3- Kararsızım	5- Çok kolay	5- Çok kolay	4- Kolay	4- Kolay	5- Çok kolay	4- Kolay	4- Kolay	3- Kararsızım	5- Çok kolay	4- Kolay
5	1999	1809101055	Erkek	Hayır	5- Çok kolay	5- Çok kolay	5- Çok kolay	2- Zor	2- Zor	2- Zor	2- Zor	3- Kararsızım	5- Çok kolay	5- Çok kolay	5- Çok kolay	2- Zor	4- Kolay	2- Zor	4- Kolay	2- Zor	2- Zor	2- Zor	2- Zor	2- Zor	2- Zor	5- Çok kolay	5- Çok kolay	5- Çok kolay	5- Çok kolay	5- Çok kolay	4- Kolay	4- Kolay	1- Çok zor	4- Kolay	4- Kolay	3- Kararsızım	4- Kolay	2- Zor	4- Kolay	5- Çok kolay	5- Çok kolay	5- Çok kolay	5- Çok kolay	5- Çok kolay	4- Kolay	4- Kolay	4- Kolay	3- Kararsızım	4- Kolay
4	2000	1809101056	Kadın	Evet	5- Çok kolay	5- Çok kolay	4- Kolay	4- Kolay	2- Zor	2- Zor	4- Kolay	2- Zor	3- Kararsızım	4- Kolay	3- Kararsızım	2- Zor	4- Kolay	3- Kararsızım	4- Kolay	2- Zor	4- Kolay	3- Kararsızım	3- Kararsızım	2- Zor	2- Zor	5- Çok kolay	3- Kararsızım	3- Kararsızım	4- Kolay	4- Kolay	4- Kolay	4- Kolay	3- Kararsızım	4- Kolay	3- Kararsızım	4- Kolay	2- Zor	1- Çok zor	3- Kararsızım	5- Çok kolay	4- Kolay	4- Kolay	5- Çok kolay	5- Çok kolay	2- Zor	4- Kolay	4- Kolay	2- Zor	4- Kolay
26	2001	1809101057	Erkek	Hayır	4- Kolay	4- Kolay	3- Kararsızım	4- Kolay	2- Zor	4- Kolay	2- Zor	4- Kolay	3- Kararsızım	4- Kolay	4- Kolay	4- Kolay	4- Kolay	3- Kararsızım	4- Kolay	4- Kolay	4- Kolay	4- Kolay	3- Kararsızım	3- Kararsızım	4- Kolay	5- Çok kolay	4- Kolay	3- Kararsızım	4- Kolay	4- Kolay	4- Kolay	4- Kolay	3- Kararsızım	5- Çok kolay	4- Kolay	3- Kararsızım	3- Kararsızım	3- Kararsızım	4- Kolay	5- Çok kolay	4- Kolay	3- Kararsızım	5- Çok kolay	4- Kolay	4- Kolay	4- Kolay	5- Çok kolay	4- Kolay	4- Kolay
21	2001	1809101058	Erkek	Evet	4- Kolay	4- Kolay	4- Kolay	4- Kolay	4- Kolay	4- Kolay	4- Kolay	3- Kararsızım	4- Kolay	3- Kararsızım	4- Kolay	4- Kolay	3- Kararsızım	4- Kolay	4- Kolay	3- Kararsızım	3- Kararsızım	4- Kolay	4- Kolay	4- Kolay	4- Kolay	4- Kolay	4- Kolay	4- Kolay	4- Kolay	4- Kolay	3- Kararsızım	3- Kararsızım	2- Zor	3- Kararsızım	3- Kararsızım	3- Kararsızım	3- Kararsızım	3- Kararsızım	3- Kararsızım	4- Kolay	4- Kolay	4- Kolay	5- Çok kolay	4- Kolay	4- Kolay	4- Kolay	5- Çok kolay	3- Kararsızım	3- Kararsızım
3	1999	1809101059	Erkek	Yanıt vermek istemiyorum	3- Kararsızım	2- Zor	2- Zor	2- Zor	3- Kararsızım	3- Kararsızım	3- Kararsızım	3- Kararsızım	4- Kolay	3- Kararsızım	3- Kararsızım	3- Kararsızım	3- Kararsızım	2- Zor	4- Kolay	4- Kolay	2- Zor	3- Kararsızım	3- Kararsızım	5- Çok kolay	4- Kolay	4- Kolay	4- Kolay	4- Kolay	4- Kolay	4- Kolay	3- Kararsızım	3- Kararsızım	4- Kolay	3- Kararsızım	3- Kararsızım	3- Kararsızım	3- Kararsızım	3- Kararsızım	3- Kararsızım	3- Kararsızım	4- Kolay	3- Kararsızım	3- Kararsızım	4- Kolay	4- Kolay	4- Kolay	4- Kolay	4- Kolay	4- Kolay
15	1998	1809101061	Erkek	Hayır	5- Çok kolay	5- Çok kolay	5- Çok kolay	5- Çok kolay	4- Kolay	4- Kolay	5- Çok kolay	2- Zor	5- Çok kolay	5- Çok kolay	5- Çok kolay	5- Çok kolay	5- Çok kolay	5- Çok kolay	5- Çok kolay	5- Çok kolay	5- Çok kolay	5- Çok kolay	5- Çok kolay	5- Çok kolay	5- Çok kolay	5- Çok kolay	5- Çok kolay	5- Çok kolay	5- Çok kolay	5- Çok kolay	5- Çok kolay	5- Çok kolay	5- Çok kolay	5- Çok kolay	5- Çok kolay	5- Çok kolay	5- Çok kolay	5- Çok kolay	5- Çok kolay	5- Çok kolay	5- Çok kolay	5- Çok kolay	5- Çok kolay	5- Çok kolay	5- Çok kolay	5- Çok kolay	5- Çok kolay	5- Çok kolay	5- Çok kolay
24	2000	1809101062	Kadın	Hayır	4- Kolay	4- Kolay	4- Kolay	4- Kolay	4- Kolay	3- Kararsızım	5- Çok kolay	4- Kolay	5- Çok kolay	5- Çok kolay	5- Çok kolay	5- Çok kolay	4- Kolay	4- Kolay	5- Çok kolay	3- Kararsızım	4- Kolay	4- Kolay	4- Kolay	4- Kolay	4- Kolay	5- Çok kolay	5- Çok kolay	5- Çok kolay	4- Kolay	5- Çok kolay	4- Kolay	4- Kolay	3- Kararsızım	4- Kolay	4- Kolay	4- Kolay	4- Kolay	4- Kolay	4- Kolay	5- Çok kolay	5- Çok kolay	5- Çok kolay	5- Çok kolay	5- Çok kolay	5- Çok kolay	4- Kolay	5- Çok kolay	3- Kararsızım	4- Kolay
10	1999	1809101063	Kadın	Hayır	4- Kolay	4- Kolay	3- Kararsızım	4- Kolay	2- Zor	5- Çok kolay	4- Kolay	3- Kararsızım	5- Çok kolay	5- Çok kolay	5- Çok kolay	5- Çok kolay	5- Çok kolay	3- Kararsızım	5- Çok kolay	4- Kolay	2- Zor	2- Zor	2- Zor	3- Kararsızım	3- Kararsızım	5- Çok kolay	5- Çok kolay	5- Çok kolay	5- Çok kolay	5- Çok kolay	3- Kararsızım	4- Kolay	3- Kararsızım	2- Zor	2- Zor	4- Kolay	3- Kararsızım	2- Zor	3- Kararsızım	4- Kolay	4- Kolay	5- Çok kolay	5- Çok kolay	5- Çok kolay	4- Kolay	5- Çok kolay	5- Çok kolay	4- Kolay	4- Kolay
29	2000	1809101064	Erkek	Hayır	4- Kolay	4- Kolay	3- Kararsızım	4- Kolay	4- Kolay	3- Kararsızım	3- Kararsızım	4- Kolay	5- Çok kolay	4- Kolay	5- Çok kolay	4- Kolay	3- Kararsızım	3- Kararsızım	4- Kolay	2- Zor	3- Kararsızım	1- Çok zor	1- Çok zor	1- Çok zor	1- Çok zor	4- Kolay	4- Kolay	4- Kolay	3- Kararsızım	4- Kolay	2- Zor	2- Zor	1- Çok zor	2- Zor	2- Zor	2- Zor	3- Kararsızım	2- Zor	3- Kararsızım	4- Kolay	4- Kolay	3- Kararsızım	5- Çok kolay	5- Çok kolay	3- Kararsızım	3- Kararsızım	3- Kararsızım	2- Zor	5- Çok kolay
12	1999	1809101065	Erkek	Hayır	4- Kolay	4- Kolay	4- Kolay	4- Kolay	2- Zor	3- Kararsızım	3- Kararsızım	3- Kararsızım	4- Kolay	4- Kolay	4- Kolay	3- Kararsızım	4- Kolay	4- Kolay	4- Kolay	3- Kararsızım	3- Kararsızım	3- Kararsızım	3- Kararsızım	3- Kararsızım	4- Kolay	4- Kolay	4- Kolay	4- Kolay	4- Kolay	4- Kolay	3- Kararsızım	3- Kararsızım	4- Kolay	3- Kararsızım	4- Kolay	3- Kararsızım	4- Kolay	3- Kararsızım	4- Kolay	4- Kolay	4- Kolay	3- Kararsızım	4- Kolay	2- Zor	2- Zor	2- Zor	3- Kararsızım	3- Kararsızım	4- Kolay
23	1999	1809101066	Erkek	Hayır	5- Çok kolay	5- Çok kolay	5- Çok kolay	5- Çok kolay	5- Çok kolay	4- Kolay	4- Kolay	5- Çok kolay	5- Çok kolay	5- Çok kolay	5- Çok kolay	5- Çok kolay	5- Çok kolay	3- Kararsızım	4- Kolay	3- Kararsızım	2- Zor	4- Kolay	4- Kolay	4- Kolay	4- Kolay	5- Çok kolay	5- Çok kolay	5- Çok kolay	4- Kolay	4- Kolay	4- Kolay	4- Kolay	4- Kolay	4- Kolay	4- Kolay	4- Kolay	4- Kolay	2- Zor	3- Kararsızım	4- Kolay	4- Kolay	4- Kolay	5- Çok kolay	5- Çok kolay	5- Çok kolay	4- Kolay	4- Kolay	2- Zor	4- Kolay
34	2000	1809101067	Erkek	Hayır	4- Kolay	4- Kolay	4- Kolay	3- Kararsızım	2- Zor	2- Zor	2- Zor	2- Zor	3- Kararsızım	4- Kolay	4- Kolay	4- Kolay	4- Kolay	5- Çok kolay	4- Kolay	4- Kolay	4- Kolay	3- Kararsızım	4- Kolay	3- Kararsızım	4- Kolay	5- Çok kolay	3- Kararsızım	3- Kararsızım	3- Kararsızım	4- Kolay	3- Kararsızım	4- Kolay	5- Çok kolay	4- Kolay	3- Kararsızım	3- Kararsızım	4- Kolay	4- Kolay	4- Kolay	3- Kararsızım	3- Kararsızım	3- Kararsızım	4- Kolay	3- Kararsızım	3- Kararsızım	3- Kararsızım	4- Kolay	3- Kararsızım	4- Kolay
13	1999	1809101068	Erkek	Hayır	5- Çok kolay	5- Çok kolay	5- Çok kolay	5- Çok kolay	3- Kararsızım	4- Kolay	4- Kolay	4- Kolay	5- Çok kolay	5- Çok kolay	5- Çok kolay	4- Kolay	3- Kararsızım	2- Zor	4- Kolay	4- Kolay	3- Kararsızım	3- Kararsızım	3- Kararsızım	3- Kararsızım	3- Kararsızım	5- Çok kolay	5- Çok kolay	4- Kolay	5- Çok kolay	5- Çok kolay	3- Kararsızım	3- Kararsızım	2- Zor	3- Kararsızım	3- Kararsızım	4- Kolay	4- Kolay	3- Kararsızım	4- Kolay	4- Kolay	4- Kolay	4- Kolay	5- Çok kolay	5- Çok kolay	4- Kolay	4- Kolay	4- Kolay	4- Kolay	4- Kolay
25	2000	1809101069	Kadın	Hayır	4- Kolay	2- Zor	2- Zor	3- Kararsızım	4- Kolay	4- Kolay	2- Zor	4- Kolay	5- Çok kolay	4- Kolay	4- Kolay	4- Kolay	4- Kolay	2- Zor	4- Kolay	2- Zor	2- Zor	2- Zor	2- Zor	3- Kararsızım	2- Zor	4- Kolay	4- Kolay	4- Kolay	4- Kolay	4- Kolay	2- Zor	2- Zor	2- Zor	2- Zor	2- Zor	2- Zor	2- Zor	2- Zor	2- Zor	4- Kolay	4- Kolay	4- Kolay	4- Kolay	4- Kolay	2- Zor	2- Zor	2- Zor	2- Zor	4- Kolay
19	1999	1809101070	Kadın	Hayır	4- Kolay	4- Kolay	4- Kolay	4- Kolay	4- Kolay	4- Kolay	4- Kolay	3- Kararsızım	4- Kolay	4- Kolay	4- Kolay	4- Kolay	4- Kolay	3- Kararsızım	3- Kararsızım	4- Kolay	4- Kolay	4- Kolay	4- Kolay	4- Kolay	4- Kolay	4- Kolay	4- Kolay	4- Kolay	3- Kararsızım	4- Kolay	4- Kolay	3- Kararsızım	3- Kararsızım	3- Kararsızım	3- Kararsızım	4- Kolay	4- Kolay	4- Kolay	4- Kolay	4- Kolay	4- Kolay	4- Kolay	4- Kolay	4- Kolay	4- Kolay	4- Kolay	3- Kararsızım	3- Kararsızım	4- Kolay
11	1999	1809101071	Erkek	Evet	4- Kolay	4- Kolay	4- Kolay	4- Kolay	4- Kolay	4- Kolay	5- Çok kolay	4- Kolay	4- Kolay	4- Kolay	4- Kolay	3- Kararsızım	4- Kolay	4- Kolay	4- Kolay	4- Kolay	4- Kolay	4- Kolay	4- Kolay	4- Kolay	4- Kolay	4- Kolay	4- Kolay	4- Kolay	4- Kolay	4- Kolay	4- Kolay	4- Kolay	4- Kolay	4- Kolay	4- Kolay	4- Kolay	4- Kolay	4- Kolay	4- Kolay	4- Kolay	4- Kolay	4- Kolay	4- Kolay	4- Kolay	4- Kolay	4- Kolay	4- Kolay	4- Kolay	4- Kolay
16	1999	1809101072	Erkek	Hayır	1- Çok zor	1- Çok zor	1- Çok zor	1- Çok zor	3- Kararsızım	4- Kolay	2- Zor	1- Çok zor	5- Çok kolay	5- Çok kolay	5- Çok kolay	4- Kolay	5- Çok kolay	5- Çok kolay	4- Kolay	1- Çok zor	1- Çok zor	1- Çok zor	1- Çok zor	2- Zor	1- Çok zor	3- Kararsızım	2- Zor	1- Çok zor	5- Çok kolay	2- Zor	4- Kolay	5- Çok kolay	1- Çok zor	4- Kolay	4- Kolay	5- Çok kolay	3- Kararsızım	1- Çok zor	1- Çok zor	5- Çok kolay	5- Çok kolay	4- Kolay	5- Çok kolay	5- Çok kolay	3- Kararsızım	5- Çok kolay	5- Çok kolay	1- Çok zor	5- Çok kolay
33	1999	1809101073	Kadın	Hayır	4- Kolay	4- Kolay	4- Kolay	4- Kolay	4- Kolay	4- Kolay	4- Kolay	4- Kolay	4- Kolay	4- Kolay	4- Kolay	4- Kolay	4- Kolay	4- Kolay	4- Kolay	4- Kolay	4- Kolay	4- Kolay	4- Kolay	3- Kararsızım	3- Kararsızım	4- Kolay	4- Kolay	4- Kolay	4- Kolay	4- Kolay	4- Kolay	4- Kolay	4- Kolay	4- Kolay	4- Kolay	4- Kolay	4- Kolay	4- Kolay	4- Kolay	4- Kolay	4- Kolay	3- Kararsızım	4- Kolay	4- Kolay	5- Çok kolay	4- Kolay	4- Kolay	4- Kolay	4- Kolay
28	1999	1809101075	Kadın	Hayır	5- Çok kolay	5- Çok kolay	4- Kolay	4- Kolay	3- Kararsızım	3- Kararsızım	3- Kararsızım	4- Kolay	5- Çok kolay	5- Çok kolay	5- Çok kolay	4- Kolay	3- Kararsızım	3- Kararsızım	5- Çok kolay	3- Kararsızım	4- Kolay	2- Zor	3- Kararsızım	3- Kararsızım	2- Zor	5- Çok kolay	4- Kolay	3- Kararsızım	5- Çok kolay	4- Kolay	4- Kolay	4- Kolay	3- Kararsızım	3- Kararsızım	3- Kararsızım	3- Kararsızım	3- Kararsızım	3- Kararsızım	3- Kararsızım	5- Çok kolay	4- Kolay	4- Kolay	5- Çok kolay	5- Çok kolay	3- Kararsızım	3- Kararsızım	3- Kararsızım	3- Kararsızım	3- Kararsızım
2	1999	1809101076	Erkek	Hayır	5- Çok kolay	2- Zor	3- Kararsızım	2- Zor	4- Kolay	3- Kararsızım	4- Kolay	4- Kolay	4- Kolay	4- Kolay	4- Kolay	4- Kolay	3- Kararsızım	2- Zor	4- Kolay	1- Çok zor	4- Kolay	1- Çok zor	1- Çok zor	1- Çok zor	2- Zor	4- Kolay	3- Kararsızım	3- Kararsızım	4- Kolay	3- Kararsızım	4- Kolay	4- Kolay	2- Zor	4- Kolay	4- Kolay	2- Zor	2- Zor	2- Zor	2- Zor	4- Kolay	2- Zor	4- Kolay	4- Kolay	4- Kolay	2- Zor	4- Kolay	4- Kolay	1- Çok zor	2- Zor
1	1999	1809101077	Kadın	Evet	4- Kolay	4- Kolay	4- Kolay	4- Kolay	4- Kolay	4- Kolay	4- Kolay	4- Kolay	4- Kolay	4- Kolay	4- Kolay	4- Kolay	4- Kolay	4- Kolay	4- Kolay	4- Kolay	4- Kolay	4- Kolay	4- Kolay	4- Kolay	4- Kolay	4- Kolay	4- Kolay	4- Kolay	4- Kolay	4- Kolay	4- Kolay	4- Kolay	5- Çok kolay	4- Kolay	4- Kolay	4- Kolay	4- Kolay	4- Kolay	4- Kolay	4- Kolay	4- Kolay	4- Kolay	4- Kolay	4- Kolay	4- Kolay	4- Kolay	4- Kolay	4- Kolay	4- Kolay
18	2000	1809101079	Kadın	Hayır	4- Kolay	5- Çok kolay	4- Kolay	4- Kolay	3- Kararsızım	2- Zor	4- Kolay	4- Kolay	4- Kolay	4- Kolay	4- Kolay	4- Kolay	4- Kolay	3- Kararsızım	4- Kolay	3- Kararsızım	2- Zor	2- Zor	4- Kolay	3- Kararsızım	3- Kararsızım	4- Kolay	5- Çok kolay	4- Kolay	4- Kolay	4- Kolay	4- Kolay	5- Çok kolay	2- Zor	4- Kolay	4- Kolay	4- Kolay	4- Kolay	3- Kararsızım	3- Kararsızım	4- Kolay	4- Kolay	4- Kolay	5- Çok kolay	5- Çok kolay	4- Kolay	5- Çok kolay	4- Kolay	4- Kolay	5- Çok kolay
6	1998	1809101080	Kadın	Hayır	5- Çok kolay	5- Çok kolay	5- Çok kolay	5- Çok kolay	3- Kararsızım	3- Kararsızım	4- Kolay	4- Kolay	4- Kolay	3- Kararsızım	4- Kolay	4- Kolay	4- Kolay	3- Kararsızım	4- Kolay	2- Zor	2- Zor	3- Kararsızım	2- Zor	3- Kararsızım	3- Kararsızım	5- Çok kolay	5- Çok kolay	5- Çok kolay	5- Çok kolay	5- Çok kolay	4- Kolay	5- Çok kolay	2- Zor	4- Kolay	3- Kararsızım	3- Kararsızım	3- Kararsızım	3- Kararsızım	2- Zor	4- Kolay	4- Kolay	4- Kolay	4- Kolay	5- Çok kolay	1- Çok zor	1- Çok zor	4- Kolay	3- Kararsızım	3- Kararsızım
17	2000	1809101081	Erkek	Evet	4- Kolay	4- Kolay	4- Kolay	4- Kolay	3- Kararsızım	4- Kolay	4- Kolay	4- Kolay	4- Kolay	4- Kolay	4- Kolay	2- Zor	2- Zor	2- Zor	2- Zor	1- Çok zor	2- Zor	3- Kararsızım	3- Kararsızım	2- Zor	2- Zor	4- Kolay	4- Kolay	4- Kolay	4- Kolay	4- Kolay	2- Zor	4- Kolay	2- Zor	2- Zor	2- Zor	2- Zor	2- Zor	2- Zor	3- Kararsızım	4- Kolay	4- Kolay	4- Kolay	4- Kolay	4- Kolay	4- Kolay	4- Kolay	2- Zor	2- Zor	2- Zor
30	1999	1809101083	Erkek	Hayır	4- Kolay	4- Kolay	2- Zor	4- Kolay	3- Kararsızım	3- Kararsızım	4- Kolay	2- Zor	5- Çok kolay	4- Kolay	5- Çok kolay	2- Zor	3- Kararsızım	3- Kararsızım	3- Kararsızım	4- Kolay	3- Kararsızım	3- Kararsızım	4- Kolay	4- Kolay	4- Kolay	5- Çok kolay	4- Kolay	3- Kararsızım	4- Kolay	4- Kolay	3- Kararsızım	4- Kolay	2- Zor	3- Kararsızım	3- Kararsızım	3- Kararsızım	3- Kararsızım	3- Kararsızım	3- Kararsızım	4- Kolay	3- Kararsızım	3- Kararsızım	5- Çok kolay	5- Çok kolay	4- Kolay	3- Kararsızım	3- Kararsızım	3- Kararsızım	3- Kararsızım
20	1968	1809101904	Erkek	Hayır	4- Kolay	4- Kolay	4- Kolay	4- Kolay	4- Kolay	4- Kolay	4- Kolay	4- Kolay	5- Çok kolay	4- Kolay	5- Çok kolay	3- Kararsızım	3- Kararsızım	3- Kararsızım	2- Zor	1- Çok zor	3- Kararsızım	2- Zor	3- Kararsızım	3- Kararsızım	3- Kararsızım	4- Kolay	4- Kolay	5- Çok kolay	5- Çok kolay	4- Kolay	3- Kararsızım	3- Kararsızım	2- Zor	3- Kararsızım	2- Zor	2- Zor	3- Kararsızım	2- Zor	3- Kararsızım	4- Kolay	3- Kararsızım	4- Kolay	4- Kolay	5- Çok kolay	2- Zor	2- Zor	4- Kolay	2- Zor	3- Kararsızım
9	1998	1909101511	Erkek	Evet	5- Çok kolay	5- Çok kolay	5- Çok kolay	5- Çok kolay	4- Kolay	3- Kararsızım	5- Çok kolay	5- Çok kolay	5- Çok kolay	5- Çok kolay	5- Çok kolay	5- Çok kolay	5- Çok kolay	5- Çok kolay	5- Çok kolay	5- Çok kolay	3- Kararsızım	3- Kararsızım	1- Çok zor	1- Çok zor	1- Çok zor	5- Çok kolay	5- Çok kolay	5- Çok kolay	5- Çok kolay	5- Çok kolay	5- Çok kolay	5- Çok kolay	5- Çok kolay	5- Çok kolay	2- Zor	2- Zor	1- Çok zor	2- Zor	5- Çok kolay	5- Çok kolay	5- Çok kolay	5- Çok kolay	5- Çok kolay	5- Çok kolay	5- Çok kolay	5- Çok kolay	5- Çok kolay	2- Zor	2- Zor
32	2000	1909101513	Erkek	Hayır	4- Kolay	4- Kolay	2- Zor	4- Kolay	3- Kararsızım	3- Kararsızım	4- Kolay	2- Zor	5- Çok kolay	4- Kolay	4- Kolay	4- Kolay	4- Kolay	3- Kararsızım	4- Kolay	3- Kararsızım	4- Kolay	4- Kolay	4- Kolay	3- Kararsızım	3- Kararsızım	4- Kolay	5- Çok kolay	5- Çok kolay	5- Çok kolay	5- Çok kolay	3- Kararsızım	4- Kolay	4- Kolay	4- Kolay	4- Kolay	3- Kararsızım	3- Kararsızım	3- Kararsızım	2- Zor	4- Kolay	4- Kolay	4- Kolay	4- Kolay	4- Kolay	4- Kolay	4- Kolay	4- Kolay	2- Zor	4- Kolay
7	2000	1909101515	Erkek	Hayır	4- Kolay	4- Kolay	2- Zor	3- Kararsızım	2- Zor	3- Kararsızım	5- Çok kolay	4- Kolay	5- Çok kolay	5- Çok kolay	3- Kararsızım	1- Çok zor	5- Çok kolay	4- Kolay	4- Kolay	3- Kararsızım	5- Çok kolay	4- Kolay	3- Kararsızım	4- Kolay	3- Kararsızım	5- Çok kolay	2- Zor	2- Zor	5- Çok kolay	1- Çok zor	5- Çok kolay	5- Çok kolay	3- Kararsızım	5- Çok kolay	4- Kolay	3- Kararsızım	4- Kolay	5- Çok kolay	5- Çok kolay	3- Kararsızım	4- Kolay	3- Kararsızım	5- Çok kolay	3- Kararsızım	3- Kararsızım	4- Kolay	5- Çok kolay	3- Kararsızım	4- Kolay
31	1999	2101101909	Kadın	Hayır	4- Kolay	4- Kolay	4- Kolay	4- Kolay	2- Zor	4- Kolay	4- Kolay	4- Kolay	4- Kolay	4- Kolay	4- Kolay	4- Kolay	4- Kolay	4- Kolay	4- Kolay	2- Zor	4- Kolay	2- Zor	4- Kolay	4- Kolay	4- Kolay	4- Kolay	4- Kolay	4- Kolay	4- Kolay	4- Kolay	4- Kolay	4- Kolay	4- Kolay	4- Kolay	4- Kolay	4- Kolay	4- Kolay	2- Zor	4- Kolay	4- Kolay	4- Kolay	2- Zor	5- Çok kolay	5- Çok kolay	4- Kolay	4- Kolay	4- Kolay	3- Kararsızım	4- Kolay
8	1998	2109101904	Erkek	Hayır	4- Kolay	4- Kolay	4- Kolay	3- Kararsızım	2- Zor	3- Kararsızım	1- Çok zor	3- Kararsızım	5- Çok kolay	4- Kolay	5- Çok kolay	4- Kolay	4- Kolay	4- Kolay	5- Çok kolay	4- Kolay	5- Çok kolay	2- Zor	2- Zor	3- Kararsızım	4- Kolay	3- Kararsızım	5- Çok kolay	5- Çok kolay	4- Kolay	4- Kolay	4- Kolay	4- Kolay	3- Kararsızım	3- Kararsızım	2- Zor	4- Kolay	4- Kolay	3- Kararsızım	5- Çok kolay	4- Kolay	4- Kolay	4- Kolay	4- Kolay	5- Çok kolay	5- Çok kolay	5- Çok kolay	4- Kolay	3- Kararsızım	2- Zor
14	2000	2109101908	Erkek	Hayır	5- Çok kolay	4- Kolay	4- Kolay	4- Kolay	2- Zor	3- Kararsızım	2- Zor	2- Zor	4- Kolay	3- Kararsızım	4- Kolay	4- Kolay	4- Kolay	3- Kararsızım	4- Kolay	1- Çok zor	2- Zor	3- Kararsızım	2- Zor	3- Kararsızım	3- Kararsızım	4- Kolay	4- Kolay	4- Kolay	3- Kararsızım	4- Kolay	4- Kolay	5- Çok kolay	1- Çok zor	4- Kolay	4- Kolay	3- Kararsızım	3- Kararsızım	3- Kararsızım	3- Kararsızım	4- Kolay	4- Kolay	4- Kolay	5- Çok kolay	5- Çok kolay	5- Çok kolay	5- Çok kolay	4- Kolay	3- Kararsızım	3- Kararsızım
22	1999	2109101916	Kadın	Hayır	4- Kolay	4- Kolay	4- Kolay	4- Kolay	3- Kararsızım	3- Kararsızım	2- Zor	1- Çok zor	4- Kolay	4- Kolay	4- Kolay	4- Kolay	3- Kararsızım	2- Zor	4- Kolay	1- Çok zor	3- Kararsızım	2- Zor	2- Zor	3- Kararsızım	2- Zor	4- Kolay	4- Kolay	4- Kolay	4- Kolay	4- Kolay	4- Kolay	4- Kolay	1- Çok zor	2- Zor	2- Zor	2- Zor	4- Kolay	2- Zor	2- Zor	4- Kolay	4- Kolay	4- Kolay	5- Çok kolay	5- Çok kolay	4- Kolay	3- Kararsızım	4- Kolay	3- Kararsızım	4- Kolay
27	2000	2109101917	Kadın	Hayır	3- Kararsızım	4- Kolay	3- Kararsızım	4- Kolay	3- Kararsızım	2- Zor	2- Zor	2- Zor	4- Kolay	4- Kolay	4- Kolay	4- Kolay	3- Kararsızım	3- Kararsızım	4- Kolay	2- Zor	2- Zor	2- Zor	2- Zor	2- Zor	2- Zor	2- Zor	2- Zor	2- Zor	2- Zor	2- Zor	2- Zor	2- Zor	2- Zor	3- Kararsızım	2- Zor	3- Kararsızım	2- Zor	2- Zor	2- Zor	2- Zor	2- Zor	2- Zor	4- Kolay	4- Kolay	1- Çok zor	2- Zor	3- Kararsızım	3- Kararsızım	3- Kararsızım
38	2000	33	Kadın	Hayır	4- Kolay	4- Kolay	4- Kolay	3- Kararsızım	2- Zor	4- Kolay	3- Kararsızım	3- Kararsızım	5- Çok kolay	5- Çok kolay	5- Çok kolay	3- Kararsızım	4- Kolay	3- Kararsızım	5- Çok kolay	2- Zor	3- Kararsızım	1- Çok zor	1- Çok zor	3- Kararsızım	3- Kararsızım	3- Kararsızım	4- Kolay	1- Çok zor	5- Çok kolay	3- Kararsızım	2- Zor	5- Çok kolay	1- Çok zor	3- Kararsızım	2- Zor	3- Kararsızım	4- Kolay	2- Zor	3- Kararsızım	4- Kolay	4- Kolay	5- Çok kolay	5- Çok kolay	5- Çok kolay	3- Kararsızım	4- Kolay	4- Kolay	2- Zor	2- Zor
[truncated: 15 more columns]

## Sheet: POST
ID	Doğum Yılınız	Öğrenci No:	Cinsiyetiniz	Afetzede oldunuz mu?	5POST1_DePOSTm, sel, heyelan ve kazalar gibi doğa ve insan kaynaklı tehlikelerin nasıl oluştuğu ile ilgili bilgiye ulaşmak	5POST2_Afetlerin insan, yapı ve çevreye vereceği zararların nasıl azaltılabileceği ile ilgili bilgiye ulaşmak	5POST3_Sel, fırtına veya bir hortumda zarar görmekten kaçınmak için ihtiyacım olan bilgiye ulaşmak	5POST4_Yaşadığım bölge ve coğrafyanın karşılaşabileceği tehlikelerin oluşturabileceği risklerin neler olduğu bilgisine ulaşmak	5POST5_Afet öncesinde, afetlerde ortaya çıkan zararlara karşı yapılabilecek sigortalar hakkında bilgiye ulaşmak	5POST6_Afet gönüllülerinin eğitimleriyle ilgili bilgilere ulaşmak	5POST7_Evimi dePOSTm, sel ve yangın gibi tehlikelere karşı yapısal olarak güçlendirmem gerektiğini anlamak	5POST8_Bir yapının selden zarar görmesini engelleyebilmek için başka bir yere taşındırılma ihtiyacını anlamak	5POST9_Afet öncesinde hazırlanan barınma yerlerinin önemli olduğunu anlamak	5POST10_Sel gibi afetlerde suya yön vermek için kullanılan kum torbası gibi malzemelerin önemli olduğunu anlamak	5POST11_Doğa kaynaklı bazı afetlerde kayıpları azaltmaya yönelik kullanılan erken uyarı sistemlerinin önemini anlamak	5POST12_Çığ oluşumunu önlemeye karşı kar birikmesini engellemek için patlayıcı kullanma ihtiyacını anlamak	5POST13_Afetlerle ilgili hangi eğitime ihtiyacım olduğuna karar vermek	5POST14_Nerede olursa olsun erken uyarı sistemleri aktif hale geçtiğinde ne yapmam gerektiğine karar vermek	5POST15_ Yaşadığım ortamda bulunan mobilya ve tablo gibi eşyaların afetler sırasında düşüp devrilerek verebileceği zararı nasıl azaltabileceğime karar vermek	5POST16_Afetlere karşı risklerimi/oluşabilecek zararları azaltabilmek için, varsa uygun mali devlet desteğine başvurmak	5POST17_Bir afet öncesinde çevremde ki çocuk, yaşlı, engelli veya yardıma ihtiyacı olan vatandaşları tespit etmek	5POST18_Kurumların halka açık acil durum ve afet planlarına ulaşmak	5POST19_Kurumların halka açık acil durum ve afet tatbikatları hakkındaki bilgilerine ulaşmak	5POST20_ Afetlerle ilgili polis, ambulans ve itfaiye gibi ilk müdahale ekiplerinin aldığı eğitimlere ulaşmak	5POST21_ Kurumların afetlerle ilgili halka açık genel hazırlık çalışmalarına ulaşmak	5POST22_ Afet eğitimlerine neden ihtiyaç olduğunu anlamak	5POST23_ Bir afet anında görevli kişilerin talimatlarına uyum göstermenin önemini anlamak	5POST24_ Resmi kurumlar tarafından cep telefonlarına gönderilen afet mesajlarının önemini anlamak	5POST25_ Benim ve çevremde ki nesnelerin uzun süreli sarsıntısından bir dePOSTm olup olmadığını anlamak	5POST26_ Afet öncesinde resmi kurumlar tarafından yapılan uyarı ve ikazların önemini anlamak	5POST27_ Afetlere hazırlık amacıyla yapılan tatbikatlarda aile bireylerinin rol ve sorumluluklarının nasıl belirleneceğine karar vermek	5POST28_ Afet çantasında neler olması gerektiğine karar vermek	5POST29_ Afete neden olan tehlikelerle ilgili medyada yer alan bilgilerin güvenirliğini değerlendirmek	5POST30_ Aile bireyleriyle aile afet planı hazırlamak	5POST31_ Aile afet planı içerisinde hazırlanan tatbikat planlarını aile bireyleriyle uygulamak	5POST32_ İlk yardım, yangın söndürme ve temel arama kurtarma eğitimlerine başvurmak	5POST33_ Kurumlar tarafından tehlikeyle ilgili uyarı ve ikazlar afet vurmadan önce hemen yapılabilirse, alandan tahliye bilgisine ulaşmak	5POST34_ Yerel kurumlar tarafından afet anında kullanılmak üzere park, bahçe gibi kamusal alanlara yerleştirilen afet ekipmanları bilgisine ulaşmak	5POST35_ Toplumda sel veya fırtına gibi bir tehlikenin erken uyarısı yapıldığında afetten korunmak için gerekli bilgiye ulaşmak	5POST36_ Bulunduğum ortamı terk edebileceğim bir kaçış planının ne kadar önemli olduğunu anlamak	5POST37_ Kurumların ilaç ve tıbbi malzeme, gıda ve giysi gibi öğeler için oluşturdukları afet ekipman kitlerinin önemini anlamak	5POST38_ Bir sel afeti öncesinde çevrenin sular altında kalmasını kum torbaları ile engelleyebilmenin önemli olduğunu anlamak	5POST39_ Arama kurtarma çalışmalarında ilk 72 saatin önemli olduğunu anlamak	5POST40_ Ambulans, itfaiye, emniyet veya diğer yardım ekiplerinin boş yere meşgul edilmemesi gerektiğini anlamak	5POST41_ Bir afet anında ihtiyaç halinde hangi kurumla temasa geçebileceğime karar vermek	5POST42_ Afet anında ikincil tehlikelerden korunmak için yapmam gerekenleri (bölgeyi terk etme veya bir aşı yaptırmak gibi) değerlendirmek	5POST43_ Yaralanan bir kişinin ilk yardıma ihtiyacı olup olmadığına karar vermek	5POST44_ Afet anında en yakın afet toplanma alanına gitmek	5POST45_ Tahliye edilme talimatlarına uyum göstermek
37	1999	1809101001	Kadın	Hayır	5- Çok kolay	5- Çok kolay	5- Çok kolay	5- Çok kolay	5- Çok kolay	5- Çok kolay	5- Çok kolay	5- Çok kolay	5- Çok kolay	5- Çok kolay	5- Çok kolay	5- Çok kolay	5- Çok kolay	5- Çok kolay	5- Çok kolay	5- Çok kolay	5- Çok kolay	4- Kolay	3- Kararsızım	3- Kararsızım	3- Kararsızım	4- Kolay	5- Çok kolay	4- Kolay	3- Kararsızım	4- Kolay	4- Kolay	4- Kolay	3- Kararsızım	3- Kararsızım	4- Kolay	3- Kararsızım	3- Kararsızım	2- Zor	3- Kararsızım	3- Kararsızım	5- Çok kolay	5- Çok kolay	5- Çok kolay	5- Çok kolay	5- Çok kolay	5- Çok kolay	4- Kolay	5- Çok kolay	5- Çok kolay
1	1999	1809101002	Erkek	Hayır	4- Kolay	4- Kolay	4- Kolay	3- Kararsızım	3- Kararsızım	2- Zor	1- Çok zor	4- Kolay	3- Kararsızım	3- Kararsızım	3- Kararsızım	3- Kararsızım	3- Kararsızım	1- Çok zor	2- Zor	3- Kararsızım	3- Kararsızım	2- Zor	2- Zor	2- Zor	2- Zor	2- Zor	4- Kolay	4- Kolay	4- Kolay	4- Kolay	4- Kolay	4- Kolay	4- Kolay	2- Zor	2- Zor	4- Kolay	4- Kolay	4- Kolay	5- Çok kolay	5- Çok kolay	4- Kolay	2- Zor	2- Zor	3- Kararsızım	5- Çok kolay	4- Kolay	5- Çok kolay	4- Kolay	5- Çok kolay
51	2000	1809101003	Erkek	Evet	2- Zor	2- Zor	2- Zor	2- Zor	2- Zor	2- Zor	5- Çok kolay	4- Kolay	5- Çok kolay	4- Kolay	4- Kolay	4- Kolay	3- Kararsızım	2- Zor	1- Çok zor	1- Çok zor	1- Çok zor	1- Çok zor	1- Çok zor	3- Kararsızım	3- Kararsızım	5- Çok kolay	5- Çok kolay	4- Kolay	4- Kolay	5- Çok kolay	4- Kolay	4- Kolay	3- Kararsızım	3- Kararsızım	4- Kolay	4- Kolay	3- Kararsızım	4- Kolay	4- Kolay	4- Kolay	4- Kolay	3- Kararsızım	2- Zor	3- Kararsızım	3- Kararsızım	3- Kararsızım	2- Zor	4- Kolay	4- Kolay
52	1999	1809101005	Kadın	Hayır	4- Kolay	4- Kolay	2- Zor	3- Kararsızım	2- Zor	4- Kolay	5- Çok kolay	5- Çok kolay	5- Çok kolay	5- Çok kolay	5- Çok kolay	5- Çok kolay	3- Kararsızım	1- Çok zor	5- Çok kolay	1- Çok zor	2- Zor	2- Zor	2- Zor	2- Zor	2- Zor	5- Çok kolay	5- Çok kolay	5- Çok kolay	5- Çok kolay	5- Çok kolay	3- Kararsızım	4- Kolay	2- Zor	4- Kolay	2- Zor	3- Kararsızım	2- Zor	2- Zor	2- Zor	5- Çok kolay	5- Çok kolay	5- Çok kolay	5- Çok kolay	5- Çok kolay	4- Kolay	2- Zor	3- Kararsızım	2- Zor	4- Kolay
64	1999	1809101006	Erkek	Evet	4- Kolay	4- Kolay	2- Zor	4- Kolay	2- Zor	3- Kararsızım	4- Kolay	5- Çok kolay	5- Çok kolay	5- Çok kolay	5- Çok kolay	3- Kararsızım	5- Çok kolay	3- Kararsızım	5- Çok kolay	3- Kararsızım	4- Kolay	3- Kararsızım	3- Kararsızım	5- Çok kolay	3- Kararsızım	5- Çok kolay	5- Çok kolay	5- Çok kolay	3- Kararsızım	5- Çok kolay	5- Çok kolay	5- Çok kolay	1- Çok zor	5- Çok kolay	5- Çok kolay	5- Çok kolay	3- Kararsızım	3- Kararsızım	3- Kararsızım	5- Çok kolay	5- Çok kolay	4- Kolay	5- Çok kolay	5- Çok kolay	5- Çok kolay	5- Çok kolay	5- Çok kolay	5- Çok kolay	5- Çok kolay
67	1999	1809101009	Erkek	Hayır	5- Çok kolay	5- Çok kolay	5- Çok kolay	5- Çok kolay	5- Çok kolay	5- Çok kolay	5- Çok kolay	5- Çok kolay	5- Çok kolay	5- Çok kolay	5- Çok kolay	5- Çok kolay	5- Çok kolay	5- Çok kolay	5- Çok kolay	3- Kararsızım	3- Kararsızım	3- Kararsızım	2- Zor	4- Kolay	5- Çok kolay	5- Çok kolay	5- Çok kolay	3- Kararsızım	3- Kararsızım	5- Çok kolay	4- Kolay	4- Kolay	2- Zor	5- Çok kolay	5- Çok kolay	5- Çok kolay	5- Çok kolay	1- Çok zor	1- Çok zor	2- Zor	2- Zor	3- Kararsızım	3- Kararsızım	3- Kararsızım	3- Kararsızım	5- Çok kolay	5- Çok kolay	2- Zor	5- Çok kolay
46	1999	1809101014	Kadın	Evet	4- Kolay	4- Kolay	5- Çok kolay	4- Kolay	4- Kolay	4- Kolay	4- Kolay	4- Kolay	4- Kolay	4- Kolay	4- Kolay	4- Kolay	4- Kolay	4- Kolay	4- Kolay	4- Kolay	4- Kolay	4- Kolay	4- Kolay	4- Kolay	4- Kolay	4- Kolay	4- Kolay	4- Kolay	4- Kolay	4- Kolay	4- Kolay	4- Kolay	4- Kolay	4- Kolay	4- Kolay	4- Kolay	4- Kolay	4- Kolay	4- Kolay	4- Kolay	4- Kolay	4- Kolay	4- Kolay	4- Kolay	4- Kolay	4- Kolay	5- Çok kolay	4- Kolay	4- Kolay
56	2000	1809101022	Erkek	Yanıt vermek istemiyorum	3- Kararsızım	3- Kararsızım	3- Kararsızım	1- Çok zor	3- Kararsızım	1- Çok zor	4- Kolay	1- Çok zor	2- Zor	5- Çok kolay	4- Kolay	4- Kolay	1- Çok zor	3- Kararsızım	3- Kararsızım	1- Çok zor	2- Zor	4- Kolay	3- Kararsızım	1- Çok zor	5- Çok kolay	3- Kararsızım	5- Çok kolay	1- Çok zor	3- Kararsızım	3- Kararsızım	2- Zor	3- Kararsızım	2- Zor	4- Kolay	5- Çok kolay	1- Çok zor	2- Zor	3- Kararsızım	4- Kolay	1- Çok zor	4- Kolay	1- Çok zor	4- Kolay	4- Kolay	2- Zor	4- Kolay	1- Çok zor	5- Çok kolay	4- Kolay
68	1999	1809101023	Erkek	Hayır	3- Kararsızım	4- Kolay	4- Kolay	4- Kolay	4- Kolay	4- Kolay	3- Kararsızım	3- Kararsızım	3- Kararsızım	3- Kararsızım	4- Kolay	3- Kararsızım	4- Kolay	3- Kararsızım	4- Kolay	3- Kararsızım	4- Kolay	4- Kolay	3- Kararsızım	4- Kolay	3- Kararsızım	4- Kolay	3- Kararsızım	4- Kolay	3- Kararsızım	4- Kolay	3- Kararsızım	4- Kolay	3- Kararsızım	3- Kararsızım	3- Kararsızım	4- Kolay	3- Kararsızım	4- Kolay	3- Kararsızım	4- Kolay	3- Kararsızım	4- Kolay	3- Kararsızım	4- Kolay	3- Kararsızım	4- Kolay	3- Kararsızım	4- Kolay	3- Kararsızım
53	2000	1809101026	Kadın	Hayır	4- Kolay	4- Kolay	4- Kolay	2- Zor	4- Kolay	1- Çok zor	2- Zor	3- Kararsızım	4- Kolay	4- Kolay	4- Kolay	4- Kolay	4- Kolay	4- Kolay	4- Kolay	4- Kolay	4- Kolay	4- Kolay	3- Kararsızım	4- Kolay	3- Kararsızım	4- Kolay	3- Kararsızım	4- Kolay	3- Kararsızım	3- Kararsızım	4- Kolay	3- Kararsızım	4- Kolay	4- Kolay	2- Zor	4- Kolay	4- Kolay	4- Kolay	4- Kolay	4- Kolay	4- Kolay	4- Kolay	4- Kolay	4- Kolay	2- Zor	4- Kolay	4- Kolay	2- Zor	4- Kolay
58	2000	1809101028	Kadın	Hayır	5- Çok kolay	3- Kararsızım	1- Çok zor	1- Çok zor	1- Çok zor	1- Çok zor	5- Çok kolay	1- Çok zor	5- Çok kolay	5- Çok kolay	5- Çok kolay	3- Kararsızım	5- Çok kolay	5- Çok kolay	5- Çok kolay	1- Çok zor	1- Çok zor	1- Çok zor	1- Çok zor	1- Çok zor	1- Çok zor	5- Çok kolay	5- Çok kolay	5- Çok kolay	3- Kararsızım	5- Çok kolay	5- Çok kolay	3- Kararsızım	1- Çok zor	3- Kararsızım	2- Zor	3- Kararsızım	1- Çok zor	1- Çok zor	1- Çok zor	5- Çok kolay	5- Çok kolay	5- Çok kolay	5- Çok kolay	5- Çok kolay	1- Çok zor	5- Çok kolay	5- Çok kolay	3- Kararsızım	5- Çok kolay
48	2001	1809101029	Kadın	Evet	4- Kolay	4- Kolay	4- Kolay	4- Kolay	4- Kolay	4- Kolay	4- Kolay	4- Kolay	4- Kolay	4- Kolay	4- Kolay	4- Kolay	4- Kolay	4- Kolay	4- Kolay	4- Kolay	4- Kolay	4- Kolay	4- Kolay	4- Kolay	4- Kolay	4- Kolay	4- Kolay	4- Kolay	5- Çok kolay	4- Kolay	4- Kolay	5- Çok kolay	4- Kolay	4- Kolay	4- Kolay	4- Kolay	4- Kolay	4- Kolay	4- Kolay	4- Kolay	4- Kolay	4- Kolay	5- Çok kolay	4- Kolay	4- Kolay	4- Kolay	5- Çok kolay	4- Kolay	5- Çok kolay
42	2000	1809101031	Erkek	Hayır	3- Kararsızım	3- Kararsızım	2- Zor	2- Zor	3- Kararsızım	4- Kolay	4- Kolay	3- Kararsızım	4- Kolay	3- Kararsızım	4- Kolay	4- Kolay	4- Kolay	3- Kararsızım	4- Kolay	4- Kolay	3- Kararsızım	3- Kararsızım	4- Kolay	4- Kolay	3- Kararsızım	4- Kolay	4- Kolay	4- Kolay	3- Kararsızım	4- Kolay	4- Kolay	4- Kolay	4- Kolay	4- Kolay	3- Kararsızım	4- Kolay	3- Kararsızım	3- Kararsızım	4- Kolay	4- Kolay	4- Kolay	4- Kolay	4- Kolay	4- Kolay	3- Kararsızım	4- Kolay	3- Kararsızım	5- Çok kolay	3- Kararsızım
44	2000	1809101032	Kadın	Evet	4- Kolay	4- Kolay	3- Kararsızım	3- Kararsızım	2- Zor	4- Kolay	4- Kolay	4- Kolay	4- Kolay	4- Kolay	4- Kolay	3- Kararsızım	4- Kolay	2- Zor	4- Kolay	3- Kararsızım	3- Kararsızım	3- Kararsızım	3- Kararsızım	3- Kararsızım	3- Kararsızım	3- Kararsızım	4- Kolay	4- Kolay	4- Kolay	4- Kolay	4- Kolay	4- Kolay	4- Kolay	3- Kararsızım	3- Kararsızım	3- Kararsızım	4- Kolay	3- Kararsızım	4- Kolay	4- Kolay	4- Kolay	4- Kolay	5- Çok kolay	5- Çok kolay	3- Kararsızım	4- Kolay	4- Kolay	3- Kararsızım	3- Kararsızım
55	2000	1809101037	Erkek	Hayır	3- Kararsızım	3- Kararsızım	3- Kararsızım	3- Kararsızım	3- Kararsızım	3- Kararsızım	3- Kararsızım	4- Kolay	4- Kolay	4- Kolay	4- Kolay	2- Zor	3- Kararsızım	4- Kolay	3- Kararsızım	3- Kararsızım	3- Kararsızım	3- Kararsızım	4- Kolay	4- Kolay	3- Kararsızım	4- Kolay	3- Kararsızım	4- Kolay	3- Kararsızım	4- Kolay	3- Kararsızım	4- Kolay	3- Kararsızım	4- Kolay	4- Kolay	3- Kararsızım	3- Kararsızım	4- Kolay	3- Kararsızım	4- Kolay	3- Kararsızım	4- Kolay	3- Kararsızım	3- Kararsızım	4- Kolay	3- Kararsızım	4- Kolay	4- Kolay	4- Kolay
38	2000	1809101043	Erkek	Hayır	3- Kararsızım	4- Kolay	3- Kararsızım	4- Kolay	2- Zor	3- Kararsızım	4- Kolay	3- Kararsızım	2- Zor	2- Zor	2- Zor	3- Kararsızım	2- Zor	2- Zor	3- Kararsızım	3- Kararsızım	2- Zor	2- Zor	4- Kolay	2- Zor	2- Zor	3- Kararsızım	5- Çok kolay	3- Kararsızım	3- Kararsızım	2- Zor	2- Zor	4- Kolay	2- Zor	3- Kararsızım	3- Kararsızım	2- Zor	4- Kolay	2- Zor	5- Çok kolay	4- Kolay	2- Zor	2- Zor	4- Kolay	2- Zor	5- Çok kolay	2- Zor	2- Zor	3- Kararsızım	3- Kararsızım
59	2000	1809101044	Kadın	Hayır	3- Kararsızım	3- Kararsızım	3- Kararsızım	4- Kolay	2- Zor	2- Zor	4- Kolay	4- Kolay	4- Kolay	4- Kolay	4- Kolay	3- Kararsızım	4- Kolay	3- Kararsızım	4- Kolay	3- Kararsızım	3- Kararsızım	2- Zor	2- Zor	2- Zor	2- Zor	4- Kolay	4- Kolay	4- Kolay	4- Kolay	4- Kolay	3- Kararsızım	4- Kolay	3- Kararsızım	3- Kararsızım	3- Kararsızım	3- Kararsızım	3- Kararsızım	3- Kararsızım	3- Kararsızım	3- Kararsızım	3- Kararsızım	3- Kararsızım	3- Kararsızım	3- Kararsızım	3- Kararsızım	3- Kararsızım	3- Kararsızım	3- Kararsızım	3- Kararsızım
47	1999	1809101045	Kadın	Hayır	3- Kararsızım	3- Kararsızım	2- Zor	4- Kolay	2- Zor	4- Kolay	4- Kolay	4- Kolay	4- Kolay	4- Kolay	4- Kolay	3- Kararsızım	4- Kolay	2- Zor	3- Kararsızım	3- Kararsızım	4- Kolay	2- Zor	2- Zor	3- Kararsızım	4- Kolay	2- Zor	4- Kolay	3- Kararsızım	3- Kararsızım	2- Zor	3- Kararsızım	4- Kolay	4- Kolay	2- Zor	2- Zor	3- Kararsızım	2- Zor	3- Kararsızım	4- Kolay	2- Zor	4- Kolay	3- Kararsızım	5- Çok kolay	5- Çok kolay	3- Kararsızım	4- Kolay	4- Kolay	3- Kararsızım	2- Zor
45	2000	1809101046	Kadın	Hayır	3- Kararsızım	4- Kolay	2- Zor	3- Kararsızım	2- Zor	3- Kararsızım	5- Çok kolay	5- Çok kolay	5- Çok kolay	3- Kararsızım	5- Çok kolay	1- Çok zor	5- Çok kolay	5- Çok kolay	5- Çok kolay	2- Zor	2- Zor	3- Kararsızım	3- Kararsızım	3- Kararsızım	3- Kararsızım	5- Çok kolay	5- Çok kolay	5- Çok kolay	5- Çok kolay	5- Çok kolay	5- Çok kolay	4- Kolay	3- Kararsızım	5- Çok kolay	5- Çok kolay	4- Kolay	5- Çok kolay	2- Zor	3- Kararsızım	5- Çok kolay	5- Çok kolay	4- Kolay	5- Çok kolay	5- Çok kolay	3- Kararsızım	5- Çok kolay	5- Çok kolay	5- Çok kolay	5- Çok kolay
62	2000	1809101048	Kadın	Hayır	5- Çok kolay	5- Çok kolay	5- Çok kolay	5- Çok kolay	5- Çok kolay	5- Çok kolay	5- Çok kolay	5- Çok kolay	5- Çok kolay	5- Çok kolay	5- Çok kolay	5- Çok kolay	5- Çok kolay	5- Çok kolay	5- Çok kolay	4- Kolay	5- Çok kolay	4- Kolay	4- Kolay	4- Kolay	4- Kolay	5- Çok kolay	5- Çok kolay	5- Çok kolay	5- Çok kolay	5- Çok kolay	5- Çok kolay	5- Çok kolay	4- Kolay	5- Çok kolay	4- Kolay	5- Çok kolay	5- Çok kolay	5- Çok kolay	5- Çok kolay	5- Çok kolay	5- Çok kolay	5- Çok kolay	5- Çok kolay	5- Çok kolay	4- Kolay	5- Çok kolay	4- Kolay	3- Kararsızım	5- Çok kolay
50	2000	1809101050	Erkek	Hayır	5- Çok kolay	5- Çok kolay	5- Çok kolay	4- Kolay	3- Kararsızım	3- Kararsızım	3- Kararsızım	5- Çok kolay	5- Çok kolay	5- Çok kolay	5- Çok kolay	4- Kolay	3- Kararsızım	3- Kararsızım	5- Çok kolay	3- Kararsızım	3- Kararsızım	3- Kararsızım	3- Kararsızım	3- Kararsızım	3- Kararsızım	5- Çok kolay	3- Kararsızım	4- Kolay	5- Çok kolay	4- Kolay	3- Kararsızım	3- Kararsızım	3- Kararsızım	3- Kararsızım	3- Kararsızım	3- Kararsızım	3- Kararsızım	3- Kararsızım	3- Kararsızım	4- Kolay	3- Kararsızım	5- Çok kolay	4- Kolay	5- Çok kolay	3- Kararsızım	3- Kararsızım	3- Kararsızım	3- Kararsızım	3- Kararsızım
61	1999	1809101051	Erkek	Hayır	4- Kolay	4- Kolay	4- Kolay	4- Kolay	4- Kolay	4- Kolay	4- Kolay	4- Kolay	3- Kararsızım	3- Kararsızım	4- Kolay	4- Kolay	4- Kolay	4- Kolay	4- Kolay	4- Kolay	4- Kolay	4- Kolay	4- Kolay	4- Kolay	4- Kolay	4- Kolay	4- Kolay	4- Kolay	4- Kolay	4- Kolay	4- Kolay	4- Kolay	4- Kolay	4- Kolay	4- Kolay	4- Kolay	4- Kolay	4- Kolay	4- Kolay	4- Kolay	4- Kolay	4- Kolay	4- Kolay	4- Kolay	4- Kolay	4- Kolay	4- Kolay	4- Kolay	3- Kararsızım
39	2000	1809101054	Erkek	Hayır	4- Kolay	4- Kolay	4- Kolay	5- Çok kolay	4- Kolay	4- Kolay	4- Kolay	4- Kolay	4- Kolay	4- Kolay	4- Kolay	4- Kolay	4- Kolay	4- Kolay	4- Kolay	4- Kolay	5- Çok kolay	5- Çok kolay	5- Çok kolay	5- Çok kolay	5- Çok kolay	5- Çok kolay	5- Çok kolay	5- Çok kolay	4- Kolay	4- Kolay	4- Kolay	4- Kolay	4- Kolay	4- Kolay	5- Çok kolay	5- Çok kolay	5- Çok kolay	5- Çok kolay	5- Çok kolay	4- Kolay	4- Kolay	4- Kolay	4- Kolay	4- Kolay	4- Kolay	4- Kolay	5- Çok kolay	4- Kolay	5- Çok kolay
18	1999	1809101055	Erkek	Hayır	5- Çok kolay	5- Çok kolay	5- Çok kolay	5- Çok kolay	5- Çok kolay	4- Kolay	5- Çok kolay	5- Çok kolay	5- Çok kolay	4- Kolay	5- Çok kolay	4- Kolay	5- Çok kolay	5- Çok kolay	4- Kolay	5- Çok kolay	5- Çok kolay	4- Kolay	5- Çok kolay	5- Çok kolay	5- Çok kolay	4- Kolay	5- Çok kolay	5- Çok kolay	5- Çok kolay	4- Kolay	5- Çok kolay	4- Kolay	5- Çok kolay	5- Çok kolay	4- Kolay	5- Çok kolay	3- Kararsızım	4- Kolay	5- Çok kolay	5- Çok kolay	5- Çok kolay	5- Çok kolay	5- Çok kolay	4- Kolay	5- Çok kolay	5- Çok kolay	5- Çok kolay	5- Çok kolay	5- Çok kolay
8	2000	1809101056	Kadın	Hayır	3- Kararsızım	3- Kararsızım	4- Kolay	3- Kararsızım	4- Kolay	4- Kolay	4- Kolay	3- Kararsızım	4- Kolay	3- Kararsızım	4- Kolay	4- Kolay	5- Çok kolay	5- Çok kolay	3- Kararsızım	4- Kolay	4- Kolay	3- Kararsızım	4- Kolay	4- Kolay	5- Çok kolay	3- Kararsızım	4- Kolay	4- Kolay	5- Çok kolay	4- Kolay	3- Kararsızım	3- Kararsızım	4- Kolay	4- Kolay	4- Kolay	3- Kararsızım	5- Çok kolay	5- Çok kolay	5- Çok kolay	3- Kararsızım	4- Kolay	3- Kararsızım	4- Kolay	4- Kolay	3- Kararsızım	4- Kolay	4- Kolay	3- Kararsızım	4- Kolay
6	2001	1809101057	Erkek	Yanıt vermek istemiyorum	4- Kolay	4- Kolay	5- Çok kolay	4- Kolay	5- Çok kolay	4- Kolay	5- Çok kolay	4- Kolay	4- Kolay	5- Çok kolay	4- Kolay	4- Kolay	4- Kolay	4- Kolay	4- Kolay	4- Kolay	4- Kolay	4- Kolay	4- Kolay	4- Kolay	4- Kolay	4- Kolay	4- Kolay	4- Kolay	4- Kolay	5- Çok kolay	4- Kolay	4- Kolay	4- Kolay	4- Kolay	4- Kolay	4- Kolay	5- Çok kolay	5- Çok kolay	4- Kolay	5- Çok kolay	4- Kolay	4- Kolay	4- Kolay	4- Kolay	5- Çok kolay	4- Kolay	5- Çok kolay	4- Kolay	4- Kolay
20	2001	1809101058	Erkek	Evet	4- Kolay	5- Çok kolay	4- Kolay	4- Kolay	4- Kolay	3- Kararsızım	5- Çok kolay	4- Kolay	4- Kolay	4- Kolay	4- Kolay	4- Kolay	5- Çok kolay	4- Kolay	4- Kolay	4- Kolay	4- Kolay	4- Kolay	4- Kolay	5- Çok kolay	4- Kolay	4- Kolay	4- Kolay	4- Kolay	4- Kolay	4- Kolay	4- Kolay	5- Çok kolay	4- Kolay	4- Kolay	4- Kolay	3- Kararsızım	4- Kolay	4- Kolay	4- Kolay	4- Kolay	5- Çok kolay	4- Kolay	4- Kolay	4- Kolay	4- Kolay	4- Kolay	4- Kolay	4- Kolay	4- Kolay
34	1998	1809101061	Erkek	Hayır	5- Çok kolay	5- Çok kolay	5- Çok kolay	5- Çok kolay	5- Çok kolay	4- Kolay	5- Çok kolay	5- Çok kolay	5- Çok kolay	5- Çok kolay	5- Çok kolay	5- Çok kolay	5- Çok kolay	5- Çok kolay	5- Çok kolay	4- Kolay	4- Kolay	5- Çok kolay	5- Çok kolay	5- Çok kolay	5- Çok kolay	5- Çok kolay	5- Çok kolay	5- Çok kolay	5- Çok kolay	5- Çok kolay	5- Çok kolay	5- Çok kolay	5- Çok kolay	5- Çok kolay	5- Çok kolay	5- Çok kolay	5- Çok kolay	5- Çok kolay	5- Çok kolay	5- Çok kolay	5- Çok kolay	5- Çok kolay	5- Çok kolay	5- Çok kolay	5- Çok kolay	5- Çok kolay	5- Çok kolay	5- Çok kolay	5- Çok kolay
27	2000	1809101062	Kadın	Evet	4- Kolay	4- Kolay	4- Kolay	4- Kolay	3- Kararsızım	4- Kolay	5- Çok kolay	5- Çok kolay	5- Çok kolay	3- Kararsızım	5- Çok kolay	3- Kararsızım	5- Çok kolay	4- Kolay	5- Çok kolay	3- Kararsızım	4- Kolay	4- Kolay	4- Kolay	5- Çok kolay	4- Kolay	5- Çok kolay	5- Çok kolay	5- Çok kolay	5- Çok kolay	5- Çok kolay	5- Çok kolay	4- Kolay	4- Kolay	5- Çok kolay	5- Çok kolay	4- Kolay	4- Kolay	4- Kolay	5- Çok kolay	5- Çok kolay	5- Çok kolay	3- Kararsızım	5- Çok kolay	5- Çok kolay	5- Çok kolay	5- Çok kolay	5- Çok kolay	4- Kolay	4- Kolay
29	1999	1809101063	Kadın	Hayır	5- Çok kolay	4- Kolay	4- Kolay	4- Kolay	2- Zor	4- Kolay	5- Çok kolay	4- Kolay	4- Kolay	4- Kolay	4- Kolay	3- Kararsızım	5- Çok kolay	4- Kolay	4- Kolay	4- Kolay	3- Kararsızım	3- Kararsızım	3- Kararsızım	4- Kolay	4- Kolay	5- Çok kolay	4- Kolay	2- Zor	5- Çok kolay	4- Kolay	3- Kararsızım	4- Kolay	2- Zor	3- Kararsızım	3- Kararsızım	4- Kolay	3- Kararsızım	2- Zor	4- Kolay	4- Kolay	4- Kolay	4- Kolay	5- Çok kolay	5- Çok kolay	3- Kararsızım	4- Kolay	4- Kolay	4- Kolay	4- Kolay
43	2000	'1809101064	Erkek	Hayır	3- Kararsızım	3- Kararsızım	4- Kolay	4- Kolay	3- Kararsızım	3- Kararsızım	4- Kolay	4- Kolay	4- Kolay	3- Kararsızım	3- Kararsızım	3- Kararsızım	4- Kolay	3- Kararsızım	4- Kolay	3- Kararsızım	2- Zor	3- Kararsızım	4- Kolay	3- Kararsızım	2- Zor	3- Kararsızım	2- Zor	4- Kolay	3- Kararsızım	4- Kolay	4- Kolay	4- Kolay	3- Kararsızım	4- Kolay	2- Zor	4- Kolay	4- Kolay	4- Kolay	3- Kararsızım	4- Kolay	4- Kolay	3- Kararsızım	4- Kolay	4- Kolay	4- Kolay	4- Kolay	4- Kolay	4- Kolay	4- Kolay
36	1999	1809101065	Erkek	Hayır	3- Kararsızım	3- Kararsızım	3- Kararsızım	2- Zor	3- Kararsızım	4- Kolay	3- Kararsızım	3- Kararsızım	3- Kararsızım	3- Kararsızım	2- Zor	3- Kararsızım	4- Kolay	4- Kolay	3- Kararsızım	2- Zor	3- Kararsızım	3- Kararsızım	3- Kararsızım	3- Kararsızım	3- Kararsızım	2- Zor	4- Kolay	3- Kararsızım	2- Zor	3- Kararsızım	4- Kolay	4- Kolay	3- Kararsızım	2- Zor	2- Zor	3- Kararsızım	4- Kolay	3- Kararsızım	3- Kararsızım	3- Kararsızım	3- Kararsızım	2- Zor	3- Kararsızım	4- Kolay	4- Kolay	3- Kararsızım	2- Zor	3- Kararsızım	3- Kararsızım
24	1999	1809101066	Erkek	Hayır	4- Kolay	4- Kolay	4- Kolay	4- Kolay	4- Kolay	4- Kolay	4- Kolay	4- Kolay	4- Kolay	4- Kolay	4- Kolay	3- Kararsızım	3- Kararsızım	3- Kararsızım	3- Kararsızım	3- Kararsızım	3- Kararsızım	3- Kararsızım	3- Kararsızım	3- Kararsızım	3- Kararsızım	3- Kararsızım	4- Kolay	4- Kolay	4- Kolay	4- Kolay	3- Kararsızım	3- Kararsızım	4- Kolay	3- Kararsızım	4- Kolay	4- Kolay	4- Kolay	3- Kararsızım	4- Kolay	4- Kolay	3- Kararsızım	4- Kolay	4- Kolay	4- Kolay	4- Kolay	3- Kararsızım	4- Kolay	4- Kolay	4- Kolay
33	2000	1809101067	Erkek	Hayır	4- Kolay	3- Kararsızım	3- Kararsızım	4- Kolay	3- Kararsızım	3- Kararsızım	4- Kolay	4- Kolay	3- Kararsızım	4- Kolay	3- Kararsızım	3- Kararsızım	4- Kolay	3- Kararsızım	3- Kararsızım	4- Kolay	2- Zor	3- Kararsızım	4- Kolay	5- Çok kolay	5- Çok kolay	4- Kolay	3- Kararsızım	4- Kolay	4- Kolay	4- Kolay	3- Kararsızım	4- Kolay	5- Çok kolay	4- Kolay	4- Kolay	4- Kolay	4- Kolay	3- Kararsızım	3- Kararsızım	4- Kolay	4- Kolay	3- Kararsızım	3- Kararsızım	3- Kararsızım	5- Çok kolay	2- Zor	3- Kararsızım	4- Kolay	3- Kararsızım
22	1999	1809101068	Erkek	Hayır	5- Çok kolay	4- Kolay	4- Kolay	5- Çok kolay	3- Kararsızım	4- Kolay	4- Kolay	4- Kolay	5- Çok kolay	5- Çok kolay	5- Çok kolay	4- Kolay	4- Kolay	4- Kolay	4- Kolay	4- Kolay	4- Kolay	4- Kolay	4- Kolay	4- Kolay	4- Kolay	4- Kolay	4- Kolay	4- Kolay	4- Kolay	4- Kolay	4- Kolay	5- Çok kolay	2- Zor	4- Kolay	4- Kolay	4- Kolay	4- Kolay	4- Kolay	4- Kolay	4- Kolay	4- Kolay	4- Kolay	4- Kolay	4- Kolay	4- Kolay	4- Kolay	4- Kolay	4- Kolay	4- Kolay
31	2000	1809101069	Kadın	Hayır	4- Kolay	4- Kolay	4- Kolay	4- Kolay	4- Kolay	4- Kolay	4- Kolay	4- Kolay	4- Kolay	4- Kolay	3- Kararsızım	4- Kolay	4- Kolay	4- Kolay	4- Kolay	4- Kolay	4- Kolay	4- Kolay	4- Kolay	4- Kolay	4- Kolay	4- Kolay	4- Kolay	4- Kolay	4- Kolay	3- Kararsızım	4- Kolay	4- Kolay	4- Kolay	4- Kolay	4- Kolay	4- Kolay	4- Kolay	4- Kolay	4- Kolay	4- Kolay	4- Kolay	4- Kolay	4- Kolay	4- Kolay	4- Kolay	4- Kolay	4- Kolay	4- Kolay	4- Kolay
19	1999	1809101070	Kadın	Hayır	4- Kolay	5- Çok kolay	3- Kararsızım	4- Kolay	3- Kararsızım	5- Çok kolay	4- Kolay	4- Kolay	4- Kolay	5- Çok kolay	5- Çok kolay	4- Kolay	4- Kolay	3- Kararsızım	3- Kararsızım	4- Kolay	5- Çok kolay	4- Kolay	4- Kolay	4- Kolay	5- Çok kolay	4- Kolay	3- Kararsızım	5- Çok kolay	3- Kararsızım	4- Kolay	3- Kararsızım	4- Kolay	5- Çok kolay	4- Kolay	5- Çok kolay	4- Kolay	4- Kolay	5- Çok kolay	3- Kararsızım	3- Kararsızım	4- Kolay	5- Çok kolay	5- Çok kolay	3- Kararsızım	4- Kolay	5- Çok kolay	4- Kolay	5- Çok kolay	3- Kararsızım
16	1999	1809101071	Erkek	Evet	4- Kolay	4- Kolay	4- Kolay	4- Kolay	4- Kolay	4- Kolay	4- Kolay	4- Kolay	4- Kolay	4- Kolay	4- Kolay	4- Kolay	4- Kolay	4- Kolay	4- Kolay	4- Kolay	4- Kolay	4- Kolay	4- Kolay	4- Kolay	4- Kolay	4- Kolay	4- Kolay	4- Kolay	4- Kolay	4- Kolay	4- Kolay	4- Kolay	4- Kolay	4- Kolay	4- Kolay	4- Kolay	5- Çok kolay	4- Kolay	5- Çok kolay	4- Kolay	5- Çok kolay	4- Kolay	4- Kolay	4- Kolay	4- Kolay	4- Kolay	4- Kolay	4- Kolay	4- Kolay
26	1999	1809101072	Erkek	Yanıt vermek istemiyorum	4- Kolay	4- Kolay	4- Kolay	5- Çok kolay	4- Kolay	4- Kolay	4- Kolay	1- Çok zor	4- Kolay	4- Kolay	4- Kolay	4- Kolay	5- Çok kolay	4- Kolay	5- Çok kolay	3- Kararsızım	5- Çok kolay	4- Kolay	4- Kolay	3- Kararsızım	4- Kolay	4- Kolay	4- Kolay	1- Çok zor	5- Çok kolay	2- Zor	4- Kolay	4- Kolay	2- Zor	4- Kolay	3- Kararsızım	4- Kolay	4- Kolay	2- Zor	4- Kolay	4- Kolay	5- Çok kolay	4- Kolay	5- Çok kolay	5- Çok kolay	4- Kolay	4- Kolay	4- Kolay	4- Kolay	5- Çok kolay
9	1999	1809101073	Kadın	Hayır	4- Kolay	4- Kolay	4- Kolay	4- Kolay	4- Kolay	4- Kolay	4- Kolay	4- Kolay	4- Kolay	4- Kolay	4- Kolay	4- Kolay	5- Çok kolay	4- Kolay	4- Kolay	4- Kolay	4- Kolay	4- Kolay	4- Kolay	4- Kolay	4- Kolay	4- Kolay	4- Kolay	4- Kolay	4- Kolay	4- Kolay	4- Kolay	4- Kolay	4- Kolay	4- Kolay	4- Kolay	4- Kolay	4- Kolay	4- Kolay	4- Kolay	4- Kolay	4- Kolay	4- Kolay	4- Kolay	4- Kolay	4- Kolay	4- Kolay	4- Kolay	4- Kolay	4- Kolay
5	1999	1809101075	Kadın	Hayır	4- Kolay	4- Kolay	4- Kolay	4- Kolay	4- Kolay	4- Kolay	4- Kolay	4- Kolay	4- Kolay	4- Kolay	4- Kolay	4- Kolay	4- Kolay	4- Kolay	4- Kolay	4- Kolay	4- Kolay	4- Kolay	4- Kolay	4- Kolay	4- Kolay	4- Kolay	4- Kolay	4- Kolay	4- Kolay	4- Kolay	4- Kolay	4- Kolay	4- Kolay	4- Kolay	4- Kolay	4- Kolay	4- Kolay	4- Kolay	4- Kolay	4- Kolay	4- Kolay	4- Kolay	4- Kolay	4- Kolay	4- Kolay	4- Kolay	4- Kolay	4- Kolay	4- Kolay
3	2000	1809101076	Erkek	Hayır	5- Çok kolay	4- Kolay	4- Kolay	5- Çok kolay	4- Kolay	5- Çok kolay	4- Kolay	4- Kolay	4- Kolay	5- Çok kolay	5- Çok kolay	5- Çok kolay	5- Çok kolay	4- Kolay	4- Kolay	4- Kolay	4- Kolay	5- Çok kolay	5- Çok kolay	5- Çok kolay	4- Kolay	4- Kolay	4- Kolay	5- Çok kolay	5- Çok kolay	4- Kolay	4- Kolay	5- Çok kolay	5- Çok kolay	5- Çok kolay	4- Kolay	4- Kolay	5- Çok kolay	5- Çok kolay	4- Kolay	5- Çok kolay	5- Çok kolay	4- Kolay	4- Kolay	5- Çok kolay	4- Kolay	5- Çok kolay	5- Çok kolay	5- Çok kolay	5- Çok kolay
7	1999	1809101077	Kadın	Evet	4- Kolay	4- Kolay	4- Kolay	4- Kolay	4- Kolay	4- Kolay	4- Kolay	4- Kolay	4- Kolay	4- Kolay	4- Kolay	4- Kolay	4- Kolay	4- Kolay	4- Kolay	4- Kolay	4- Kolay	4- Kolay	4- Kolay	4- Kolay	4- Kolay	4- Kolay	4- Kolay	4- Kolay	4- Kolay	4- Kolay	4- Kolay	4- Kolay	4- Kolay	4- Kolay	4- Kolay	4- Kolay	4- Kolay	4- Kolay	4- Kolay	4- Kolay	4- Kolay	4- Kolay	4- Kolay	4- Kolay	4- Kolay	4- Kolay	4- Kolay	4- Kolay	4- Kolay
28	1999	1809101078	Kadın	Hayır	4- Kolay	4- Kolay	4- Kolay	4- Kolay	3- Kararsızım	4- Kolay	4- Kolay	3- Kararsızım	3- Kararsızım	4- Kolay	4- Kolay	4- Kolay	3- Kararsızım	4- Kolay	4- Kolay	3- Kararsızım	4- Kolay	4- Kolay	4- Kolay	4- Kolay	4- Kolay	5- Çok kolay	5- Çok kolay	4- Kolay	4- Kolay	5- Çok kolay	5- Çok kolay	5- Çok kolay	3- Kararsızım	5- Çok kolay	3- Kararsızım	5- Çok kolay	3- Kararsızım	3- Kararsızım	4- Kolay	5- Çok kolay	5- Çok kolay	5- Çok kolay	5- Çok kolay	5- Çok kolay	4- Kolay	5- Çok kolay	4- Kolay	4- Kolay	4- Kolay
35	2000	1809101079	Kadın	Hayır	4- Kolay	5- Çok kolay	4- Kolay	4- Kolay	5- Çok kolay	4- Kolay	5- Çok kolay	5- Çok kolay	5- Çok kolay	5- Çok kolay	5- Çok kolay	5- Çok kolay	5- Çok kolay	3- Kararsızım	5- Çok kolay	5- Çok kolay	3- Kararsızım	3- Kararsızım	4- Kolay	4- Kolay	4- Kolay	5- Çok kolay	5- Çok kolay	5- Çok kolay	5- Çok kolay	4- Kolay	5- Çok kolay	5- Çok kolay	5- Çok kolay	4- Kolay	5- Çok kolay	3- Kararsızım	4- Kolay	5- Çok kolay	4- Kolay	5- Çok kolay	5- Çok kolay	5- Çok kolay	5- Çok kolay	5- Çok kolay	5- Çok kolay	5- Çok kolay	4- Kolay	4- Kolay	5- Çok kolay
25	1998	1809101080	Kadın	Hayır	4- Kolay	4- Kolay	4- Kolay	4- Kolay	4- Kolay	4- Kolay	4- Kolay	4- Kolay	4- Kolay	4- Kolay	4- Kolay	4- Kolay	4- Kolay	4- Kolay	4- Kolay	4- Kolay	4- Kolay	4- Kolay	4- Kolay	4- Kolay	4- Kolay	4- Kolay	4- Kolay	4- Kolay	4- Kolay	4- Kolay	4- Kolay	5- Çok kolay	1- Çok zor	5- Çok kolay	3- Kararsızım	4- Kolay	3- Kararsızım	3- Kararsızım	3- Kararsızım	5- Çok kolay	5- Çok kolay	5- Çok kolay	5- Çok kolay	5- Çok kolay	5- Çok kolay	5- Çok kolay	5- Çok kolay	3- Kararsızım	4- Kolay
15	2000	1809101081	Erkek	Evet	4- Kolay	4- Kolay	4- Kolay	4- Kolay	3- Kararsızım	4- Kolay	4- Kolay	4- Kolay	4- Kolay	4- Kolay	4- Kolay	4- Kolay	4- Kolay	4- Kolay	4- Kolay	3- Kararsızım	4- Kolay	4- Kolay	4- Kolay	4- Kolay	4- Kolay	4- Kolay	4- Kolay	4- Kolay	4- Kolay	4- Kolay	4- Kolay	4- Kolay	4- Kolay	4- Kolay	4- Kolay	4- Kolay	4- Kolay	4- Kolay	4- Kolay	4- Kolay	4- Kolay	4- Kolay	5- Çok kolay	4- Kolay	4- Kolay	4- Kolay	4- Kolay	4- Kolay	4- Kolay
14	1999	1809101083	Erkek	Hayır	4- Kolay	3- Kararsızım	4- Kolay	4- Kolay	3- Kararsızım	4- Kolay	4- Kolay	4- Kolay	2- Zor	4- Kolay	4- Kolay	4- Kolay	3- Kararsızım	3- Kararsızım	4- Kolay	4- Kolay	4- Kolay	4- Kolay	4- Kolay	4- Kolay	3- Kararsızım	4- Kolay	3- Kararsızım	4- Kolay	3- Kararsızım	3- Kararsızım	4- Kolay	4- Kolay	4- Kolay	4- Kolay	3- Kararsızım	4- Kolay	4- Kolay	4- Kolay	4- Kolay	4- Kolay	3- Kararsızım	4- Kolay	4- Kolay	4- Kolay	4- Kolay	4- Kolay	4- Kolay	5- Çok kolay	3- Kararsızım
32	1968	1809101904	Erkek	Hayır	3- Kararsızım	3- Kararsızım	3- Kararsızım	4- Kolay	2- Zor	3- Kararsızım	2- Zor	3- Kararsızım	4- Kolay	4- Kolay	4- Kolay	3- Kararsızım	4- Kolay	3- Kararsızım	4- Kolay	2- Zor	3- Kararsızım	2- Zor	2- Zor	3- Kararsızım	3- Kararsızım	4- Kolay	4- Kolay	3- Kararsızım	4- Kolay	3- Kararsızım	3- Kararsızım	3- Kararsızım	2- Zor	3- Kararsızım	3- Kararsızım	3- Kararsızım	3- Kararsızım	2- Zor	3- Kararsızım	4- Kolay	4- Kolay	3- Kararsızım	5- Çok kolay	5- Çok kolay	3- Kararsızım	4- Kolay	4- Kolay	3- Kararsızım	4- Kolay
12	1998	1909101511	Erkek	Evet	4- Kolay	4- Kolay	4- Kolay	4- Kolay	4- Kolay	4- Kolay	4- Kolay	4- Kolay	4- Kolay	4- Kolay	4- Kolay	4- Kolay	4- Kolay	4- Kolay	3- Kararsızım	4- Kolay	4- Kolay	4- Kolay	4- Kolay	4- Kolay	4- Kolay	4- Kolay	4- Kolay	4- Kolay	4- Kolay	4- Kolay	4- Kolay	5- Çok kolay	5- Çok kolay	4- Kolay	5- Çok kolay	4- Kolay	4- Kolay	4- Kolay	5- Çok kolay	5- Çok kolay	4- Kolay	5- Çok kolay	4- Kolay	4- Kolay	4- Kolay	4- Kolay	4- Kolay	5- Çok kolay	4- Kolay
13	2000	1909101513	Erkek	Hayır	4- Kolay	4- Kolay	4- Kolay	4- Kolay	4- Kolay	4- Kolay	4- Kolay	4- Kolay	4- Kolay	4- Kolay	4- Kolay	4- Kolay	5- Çok kolay	4- Kolay	5- Çok kolay	4- Kolay	4- Kolay	4- Kolay	4- Kolay	4- Kolay	4- Kolay	4- Kolay	5- Çok kolay	4- Kolay	4- Kolay	4- Kolay	4- Kolay	4- Kolay	4- Kolay	5- Çok kolay	4- Kolay	4- Kolay	4- Kolay	5- Çok kolay	4- Kolay	5- Çok kolay	4- Kolay	4- Kolay	5- Çok kolay	4- Kolay	4- Kolay	4- Kolay	4- Kolay	5- Çok kolay	4- Kolay
4	2000	1909101515	Erkek	Hayır	5- Çok kolay	4- Kolay	5- Çok kolay	5- Çok kolay	5- Çok kolay	4- Kolay	5- Çok kolay	5- Çok kolay	3- Kararsızım	4- Kolay	5- Çok kolay	4- Kolay	5- Çok kolay	4- Kolay	5- Çok kolay	5- Çok kolay	5- Çok kolay	4- Kolay	5- Çok kolay	4- Kolay	5- Çok kolay	4- Kolay	5- Çok kolay	5- Çok kolay	5- Çok kolay	5- Çok kolay	5- Çok kolay	4- Kolay	3- Kararsızım	4- Kolay	5- Çok kolay	4- Kolay	5- Çok kolay	5- Çok kolay	5- Çok kolay	4- Kolay	3- Kararsızım	5- Çok kolay	5- Çok kolay	4- Kolay	5- Çok kolay	5- Çok kolay	5- Çok kolay	3- Kararsızım	4- Kolay
2	1999	2100101909	Kadın	Hayır	4- Kolay	4- Kolay	4- Kolay	4- Kolay	4- Kolay	4- Kolay	4- Kolay	4- Kolay	4- Kolay	4- Kolay	4- Kolay	4- Kolay	4- Kolay	4- Kolay	4- Kolay	4- Kolay	4- Kolay	4- Kolay	4- Kolay	4- Kolay	4- Kolay	4- Kolay	4- Kolay	4- Kolay	4- Kolay	4- Kolay	4- Kolay	4- Kolay	4- Kolay	4- Kolay	4- Kolay	4- Kolay	4- Kolay	4- Kolay	4- Kolay	4- Kolay	4- Kolay	4- Kolay	4- Kolay	4- Kolay	4- Kolay	4- Kolay	4- Kolay	4- Kolay	4- Kolay
11	1998	2109101904	Erkek	Evet	4- Kolay	5- Çok kolay	5- Çok kolay	5- Çok kolay	5- Çok kolay	4- Kolay	5- Çok kolay	4- Kolay	5- Çok kolay	4- Kolay	3- Kararsızım	5- Çok kolay	4- Kolay	5- Çok kolay	5- Çok kolay	4- Kolay	5- Çok kolay	5- Çok kolay	4- Kolay	4- Kolay	5- Çok kolay	5- Çok kolay	4- Kolay	5- Çok kolay	4- Kolay	4- Kolay	4- Kolay	4- Kolay	5- Çok kolay	5- Çok kolay	4- Kolay	5- Çok kolay	5- Çok kolay	4- Kolay	4- Kolay	5- Çok kolay	5- Çok kolay	4- Kolay	5- Çok kolay	4- Kolay	4- Kolay	5- Çok kolay	5- Çok kolay	5- Çok kolay	4- Kolay
30	2000	2109101908	Erkek	Hayır	5- Çok kolay	5- Çok kolay	5- Çok kolay	5- Çok kolay	5- Çok kolay	5- Çok kolay	5- Çok kolay	5- Çok kolay	5- Çok kolay	5- Çok kolay	5- Çok kolay	5- Çok kolay	5- Çok kolay	5- Çok kolay	4- Kolay	3- Kararsızım	3- Kararsızım	3- Kararsızım	5- Çok kolay	5- Çok kolay	4- Kolay	4- Kolay	4- Kolay	4- Kolay	3- Kararsızım	4- Kolay	4- Kolay	5- Çok kolay	3- Kararsızım	4- Kolay	3- Kararsızım	3- Kararsızım	3- Kararsızım	4- Kolay	4- Kolay	4- Kolay	4- Kolay	4- Kolay	4- Kolay	5- Çok kolay	3- Kararsızım	3- Kararsızım	4- Kolay	2- Zor	4- Kolay
21	1999	2109101916	Kadın	Hayır	5- Çok kolay	5- Çok kolay	5- Çok kolay	5- Çok kolay	5- Çok kolay	5- Çok kolay	5- Çok kolay	5- Çok kolay	5- Çok kolay	5- Çok kolay	5- Çok kolay	5- Çok kolay	5- Çok kolay	5- Çok kolay	5- Çok kolay	1- Çok zor	5- Çok kolay	3- Kararsızım	3- Kararsızım	2- Zor	2- Zor	5- Çok kolay	5- Çok kolay	5- Çok kolay	5- Çok kolay	5- Çok kolay	5- Çok kolay	5- Çok kolay	3- Kararsızım	3- Kararsızım	3- Kararsızım	3- Kararsızım	3- Kararsızım	3- Kararsızım	3- Kararsızım	5- Çok kolay	5- Çok kolay	5- Çok kolay	5- Çok kolay	5- Çok kolay	5- Çok kolay	5- Çok kolay	5- Çok kolay	5- Çok kolay	5- Çok kolay
10	2000	2109101917	Kadın	Hayır	4- Kolay	4- Kolay	4- Kolay	4- Kolay	4- Kolay	4- Kolay	4- Kolay	4- Kolay	4- Kolay	4- Kolay	4- Kolay	4- Kolay	4- Kolay	4- Kolay	4- Kolay	4- Kolay	4- Kolay	4- Kolay	4- Kolay	4- Kolay	4- Kolay	4- Kolay	4- Kolay	4- Kolay	4- Kolay	4- Kolay	4- Kolay	4- Kolay	4- Kolay	4- Kolay	4- Kolay	4- Kolay	4- Kolay	4- Kolay	4- Kolay	4- Kolay	4- Kolay	4- Kolay	4- Kolay	4- Kolay	4- Kolay	4- Kolay	4- Kolay	4- Kolay	4- Kolay
23	2000	2109101920	Kadın	Hayır	5- Çok kolay	5- Çok kolay	5- Çok kolay	5- Çok kolay	5- Çok kolay	5- Çok kolay	5- Çok kolay	5- Çok kolay	5- Çok kolay	4- Kolay	5- Çok kolay	5- Çok kolay	5- Çok kolay	5- Çok kolay	5- Çok kolay	4- Kolay	4- Kolay	5- Çok kolay	5- Çok kolay	5- Çok kolay	4- Kolay	5- Çok kolay	5- Çok kolay	5- Çok kolay	5- Çok kolay	5- Çok kolay	5- Çok kolay	4- Kolay	5- Çok kolay	4- Kolay	4- Kolay	5- Çok kolay	4- Kolay	5- Çok kolay	5- Çok kolay	5- Çok kolay	5- Çok kolay	5- Çok kolay	5- Çok kolay	5- Çok kolay	4- Kolay	5- Çok kolay	5- Çok kolay	3- Kararsızım	4- Kolay
17	1999	2209101906	Erkek	Hayır	3- Kararsızım	4- Kolay	3- Kararsızım	4- Kolay	4- Kolay	4- Kolay	4- Kolay	5- Çok kolay	5- Çok kolay	5- Çok kolay	5- Çok kolay	3- Kararsızım	3- Kararsızım	3- Kararsızım	3- Kararsızım	3- Kararsızım	4- Kolay	4- Kolay	4- Kolay	4- Kolay	4- Kolay	4- Kolay	5- Çok kolay	5- Çok kolay	5- Çok kolay	5- Çok kolay	5- Çok kolay	5- Çok kolay	5- Çok kolay	5- Çok kolay	4- Kolay	3- Kararsızım	3- Kararsızım	3- Kararsızım	4- Kolay	4- Kolay	3- Kararsızım	3- Kararsızım	5- Çok kolay	5- Çok kolay	4- Kolay	3- Kararsızım	5- Çok kolay	5- Çok kolay	3- Kararsızım
65	1998	1809101007	Erkek	Hayır	4- Kolay	4- Kolay	3- Kararsızım	3- Kararsızım	3- Kararsızım	4- Kolay	3- Kararsızım	4- Kolay	3- Kararsızım	3- Kararsızım	3- Kararsızım	3- Kararsızım	4- Kolay	2- Zor	4- Kolay	5- Çok kolay	2- Zor	3- Kararsızım	4- Kolay	2- Zor	4- Kolay	3- Kararsızım	3- Kararsızım	3- Kararsızım	3- Kararsızım	3- Kararsızım	3- Kararsızım	3- Kararsızım	3- Kararsızım	3- Kararsızım	3- Kararsızım	3- Kararsızım	3- Kararsızım	3- Kararsızım	3- Kararsızım	3- Kararsızım	3- Kararsızım	3- Kararsızım	3- Kararsızım	3- Kararsızım	3- Kararsızım	3- Kararsızım	3- Kararsızım	3- Kararsızım	3- Kararsızım
40	1999	1809101008	Kadın	Evet	4- Kolay	4- Kolay	3- Kararsızım	3- Kararsızım	2- Zor	3- Kararsızım	4- Kolay	4- Kolay	4- Kolay	4- Kolay	4- Kolay	4- Kolay	4- Kolay	3- Kararsızım	4- Kolay	2- Zor	2- Zor	3- Kararsızım	3- Kararsızım	3- Kararsızım	3- Kararsızım	4- Kolay	4- Kolay	4- Kolay	3- Kararsızım	4- Kolay	4- Kolay	4- Kolay	2- Zor	3- Kararsızım	4- Kolay	3- Kararsızım	4- Kolay	3- Kararsızım	3- Kararsızım	4- Kolay	4- Kolay	4- Kolay	4- Kolay	4- Kolay	3- Kararsızım	4- Kolay	4- Kolay	3- Kararsızım	4- Kolay
60	1999	1809101012	Kadın	Hayır	4- Kolay	3- Kararsızım	3- Kararsızım	4- Kolay	2- Zor	2- Zor	4- Kolay	4- Kolay	4- Kolay	4- Kolay	4- Kolay	3- Kararsızım	4- Kolay	3- Kararsızım	4- Kolay	3- Kararsızım	3- Kararsızım	2- Zor	2- Zor	2- Zor	4- Kolay	4- Kolay	2- Zor	4- Kolay	3- Kararsızım	3- Kararsızım	3- Kararsızım	3- Kararsızım	3- Kararsızım	3- Kararsızım	3- Kararsızım	3- Kararsızım	3- Kararsızım	3- Kararsızım	2- Zor	2- Zor	5- Çok kolay	4- Kolay	3- Kararsızım	3- Kararsızım	3- Kararsızım	3- Kararsızım	3- Kararsızım	4- Kolay	3- Kararsızım
54	2000	1809101015	Kadın	Hayır	4- Kolay	4- Kolay	2- Zor	2- Zor	3- Kararsızım	2- Zor	2- Zor	3- Kararsızım	4- Kolay	2- Zor	4- Kolay	3- Kararsızım	3- Kararsızım	3- Kararsızım	4- Kolay	3- Kararsızım	4- Kolay	3- Kararsızım	4- Kolay	4- Kolay	2- Zor	4- Kolay	4- Kolay	2- Zor	4- Kolay	4- Kolay	4- Kolay	4- Kolay	1- Çok zor	3- Kararsızım	2- Zor	4- Kolay	4- Kolay	4- Kolay	4- Kolay	4- Kolay	2- Zor	2- Zor	4- Kolay	4- Kolay	4- Kolay	4- Kolay	4- Kolay	4- Kolay	3- Kararsızım
66	2000	1809101016	Erkek	Evet	4- Kolay	4- Kolay	4- Kolay	3- Kararsızım	2- Zor	4- Kolay	4- Kolay	2- Zor	4- Kolay	4- Kolay	4- Kolay	4- Kolay	4- Kolay	4- Kolay	4- Kolay	4- Kolay	4- Kolay	4- Kolay	4- Kolay	4- Kolay	4- Kolay	4- Kolay	4- Kolay	2- Zor	5- Çok kolay	4- Kolay	4- Kolay	4- Kolay	4- Kolay	2- Zor	4- Kolay	4- Kolay	4- Kolay	4- Kolay	4- Kolay	5- Çok kolay	4- Kolay	4- Kolay	4- Kolay	4- Kolay	4- Kolay	3- Kararsızım	4- Kolay	4- Kolay	4- Kolay
69	2000	1809101019	Kadın	Hayır	5- Çok kolay	4- Kolay	4- Kolay	4- Kolay	3- Kararsızım	5- Çok kolay	4- Kolay	4- Kolay	5- Çok kolay	4- Kolay	5- Çok kolay	4- Kolay	4- Kolay	4- Kolay	5- Çok kolay	2- Zor	4- Kolay	3- Kararsızım	5- Çok kolay	3- Kararsızım	3- Kararsızım	5- Çok kolay	5- Çok kolay	5- Çok kolay	4- Kolay	5- Çok kolay	4- Kolay	4- Kolay	3- Kararsızım	4- Kolay	3- Kararsızım	4- Kolay	4- Kolay	3- Kararsızım	3- Kararsızım	5- Çok kolay	5- Çok kolay	4- Kolay	5- Çok kolay	5- Çok kolay	4- Kolay	4- Kolay	3- Kararsızım	2- Zor	2- Zor
63	2000	1809101025	Erkek	Evet	4- Kolay	2- Zor	4- Kolay	4- Kolay	3- Kararsızım	1- Çok zor	4- Kolay	3- Kararsızım	5- Çok kolay	4- Kolay	5- Çok kolay	4- Kolay	3- Kararsızım	5- Çok kolay	4- Kolay	3- Kararsızım	4- Kolay	2- Zor	2- Zor	2- Zor	3- Kararsızım	4- Kolay	5- Çok kolay	5- Çok kolay	3- Kararsızım	1- Çok zor	1- Çok zor	5- Çok kolay	1- Çok zor	1- Çok zor	1- Çok zor	2- Zor	2- Zor	1- Çok zor	2- Zor	4- Kolay	4- Kolay	4- Kolay	5- Çok kolay	5- Çok kolay	5- Çok kolay	5- Çok kolay	4- Kolay	2- Zor	3- Kararsızım
49	1999	1809101027	Erkek	Evet	4- Kolay	3- Kararsızım	2- Zor	3- Kararsızım	1- Çok zor	2- Zor	2- Zor	2- Zor	3- Kararsızım	3- Kararsızım	3- Kararsızım	1- Çok zor	2- Zor	2- Zor	4- Kolay	1- Çok zor	2- Zor	2- Zor	1- Çok zor	2- Zor	2- Zor	4- Kolay	2- Zor	1- Çok zor	5- Çok kolay	2- Zor	2- Zor	4- Kolay	1- Çok zor	3- Kararsızım	3- Kararsızım	2- Zor	1- Çok zor	1- Çok zor	1- Çok zor	5- Çok kolay	5- Çok kolay	3- Kararsızım	5- Çok kolay	5- Çok kolay	1- Çok zor	1- Çok zor	4- Kolay	2- Zor	1- Çok zor
41	2000	1809101033	Kadın	Hayır	4- Kolay	5- Çok kolay	4- Kolay	4- Kolay	3- Kararsızım	3- Kararsızım	4- Kolay	4- Kolay	5- Çok kolay	4- Kolay	5- Çok kolay	3- Kararsızım	4- Kolay	4- Kolay	5- Çok kolay	3- Kararsızım	4- Kolay	3- Kararsızım	3- Kararsızım	3- Kararsızım	4- Kolay	5- Çok kolay	5- Çok kolay	3- Kararsızım	5- Çok kolay	5- Çok kolay	4- Kolay	5- Çok kolay	3- Kararsızım	4- Kolay	4- Kolay	3- Kararsızım	5- Çok kolay	3- Kararsızım	4- Kolay	5- Çok kolay	5- Çok kolay	3- Kararsızım	5- Çok kolay	5- Çok kolay	4- Kolay	4- Kolay	4- Kolay	3- Kararsızım	3- Kararsızım
57	1999	1809101042	Erkek	Hayır	3- Kararsızım	4- Kolay	2- Zor	3- Kararsızım	2- Zor	3- Kararsızım	4- Kolay	2- Zor	3- Kararsızım	4- Kolay	3- Kararsızım	2- Zor	2- Zor	3- Kararsızım	4- Kolay	4- Kolay	3- Kararsızım	2- Zor	4- Kolay	4- Kolay	3- Kararsızım	3- Kararsızım	2- Zor	4- Kolay	2- Zor	3- Kararsızım	1- Çok zor	3- Kararsızım	4- Kolay	2- Zor	4- Kolay	3- Kararsızım	4- Kolay	2- Zor	3- Kararsızım	4- Kolay	4- Kolay	4- Kolay	3- Kararsızım	4- Kolay	4- Kolay	3- Kararsızım	4- Kolay	2- Zor	3- Kararsızım
[truncated: 15 more columns]

## Sheet: PREPOST SPSS
Doğum Yılınız	Öğrenci No:	Cinsiyetiniz	Afetzede oldunuz mu?	Doğum Yılınız	Öğrenci No:	Cinsiyetiniz
1999	1809101001	Kadın	Hayır	1999	1809101001	Kadın
1999	1809101002	Erkek	Hayır	1999	1809101002	Erkek
2000	1809101003	Erkek	Evet	2000	1809101003	Erkek
1999	1809101005	Kadın	Hayır	1999	1809101005	Kadın
1999	1809101006	Erkek	Evet	1999	1809101006	Erkek
1999	1809101009	Erkek	Hayır	1998	1809101007	Erkek
1999	1809101014	Kadın	Evet	1999	1809101008	Kadın
2000	1809101022	Erkek	Hayır	1999	1809101009	Erkek
1999	1809101023	Erkek	Hayır	1999	1809101012	Kadın
2000	1809101026	Kadın	Hayır	1999	1809101014	Kadın
2000	1809101028	Kadın	Hayır	2000	1809101015	Kadın
2001	1809101029	Kadın	Evet	2000	1809101016	Erkek
2000	1809101031	Erkek	Hayır	2000	1809101019	Kadın
2000	1809101032	Kadın	Hayır	2000	1809101022	Erkek
2000	1809101037	Erkek	Hayır	1999	1809101023	Erkek
2000	1809101043	Erkek	Hayır	2000	1809101025	Erkek
2000	1809101044	Kadın	Hayır	2000	1809101026	Kadın
2000	1809101046	Kadın	Hayır	1999	1809101027	Erkek
2000	1809101048	Kadın	Hayır	2000	1809101028	Kadın
2000	1809101050	Erkek	Hayır	2001	1809101029	Kadın
1999	1809101051	Erkek	Hayır	2000	1809101031	Erkek
2000	1809101054	Erkek	Hayır	2000	1809101032	Kadın
1999	1809101055	Erkek	Hayır	2000	1809101033	Kadın
2000	1809101056	Kadın	Evet	2000	1809101037	Erkek
2001	1809101057	Erkek	Hayır	1999	1809101042	Erkek
2001	1809101058	Erkek	Evet	2000	1809101043	Erkek
1999	1809101059	Erkek	Yanıt vermek istemiyorum	2000	1809101044	Kadın
1998	1809101061	Erkek	Hayır	1999	1809101045	Kadın
2000	1809101062	Kadın	Hayır	2000	1809101046	Kadın
1999	1809101063	Kadın	Hayır	2000	1809101048	Kadın
2000	1809101064	Erkek	Hayır	2000	1809101050	Erkek
1999	1809101065	Erkek	Hayır	1999	1809101051	Erkek
1999	1809101066	Erkek	Hayır	2000	1809101054	Erkek
2000	1809101067	Erkek	Hayır	1999	1809101055	Erkek
1999	1809101068	Erkek	Hayır	2000	1809101056	Kadın
2000	1809101069	Kadın	Hayır	2001	1809101057	Erkek
1999	1809101070	Kadın	Hayır	2001	1809101058	Erkek
1999	1809101071	Erkek	Evet	1998	1809101061	Erkek
1999	1809101072	Erkek	Hayır	2000	1809101062	Kadın
1999	1809101073	Kadın	Hayır	1999	1809101063	Kadın
1999	1809101075	Kadın	Hayır	2000	'1809101064	Erkek
1999	1809101076	Erkek	Hayır	1999	1809101065	Erkek
1999	1809101077	Kadın	Evet	1999	1809101066	Erkek
2000	1809101079	Kadın	Hayır	2000	1809101067	Erkek
1998	1809101080	Kadın	Hayır	1999	1809101068	Erkek
2000	1809101081	Erkek	Evet	2000	1809101069	Kadın
1999	1809101083	Erkek	Hayır	1999	1809101070	Kadın
1968	1809101904	Erkek	Hayır	1999	1809101071	Erkek
1998	1909101511	Erkek	Evet	1999	1809101072	Erkek
2000	1909101513	Erkek	Hayır	1999	1809101073	Kadın
2000	1909101515	Erkek	Hayır	1999	1809101075	Kadın
1999	2101101909	Kadın	Hayır	2000	1809101076	Erkek
1998	2109101904	Erkek	Hayır	1999	1809101077	Kadın
2000	2109101908	Erkek	Hayır	1999	1809101078	Kadın
1999	2109101916	Kadın	Hayır	2000	1809101079	Kadın
2000	2109101917	Kadın	Hayır	1998	1809101080	Kadın
2000	33	Kadın	Hayır	2000	1809101081	Erkek
				1999	1809101083	Erkek
				1968	1809101904	Erkek
				1998	1909101511	Erkek
				2000	1909101513	Erkek
				2000	1909101515	Erkek
				1999	2100101909	Kadın
				1998	2109101904	Erkek
				2000	2109101908	Erkek
				1999	2109101916	Kadın
				2000	2109101917	Kadın
				2000	2109101920	Kadın
				1999	2209101906	Erkek

## Sheet: NUMARALAR
PREÖğrenci No:	Öğrenci No:
1809101001	1809101002				1809101002
1809101002	1809101001				1809101031
1809101003	1809101003				1809101059
1809101005	1809101005				1809101064
1809101006	1809101006
1809101009	1809101007
1809101014	1809101008
1809101022	1809101009
1809101023	1809101012
1809101026	1809101014
1809101028	1809101015
1809101029	1809101016
1809101031	1809101019
1809101032	1809101022
1809101037	1809101023
1809101043	1809101025
1809101044	1809101026
1809101046	1809101027
1809101048	1809101028
1809101050	1809101029
1809101051	1809101032
1809101054	1809101033
1809101055	1809101034	0
1809101056	1809101035
1809101057	1809101037
1809101058	1809101042
1809101059	1809101043
1809101061	1809101044
1809101062	1809101045
1809101063	1809101046
1809101064	1809101048
1809101065	1809101050
1809101066	1809101051
1809101067	1809101054
1809101068	1809101055
1809101069	1809101056
1809101070	1809101057
1809101071	1809101058
1809101072	1809101061
1809101073	1809101062
1809101075	1809101063
1809101076	1809101065
1809101077	1809101066
1809101079	1809101067
1809101080	1809101068
1809101081	1809101069
1809101083	1809101070
1809101904	1809101071
1909101511	1809101072
1909101513	1809101073
1909101515	1809101075
2101101909	1809101076
2109101904	1809101077
2109101908	1809101078
2109101916	1809101079
2109101917	1809101080
33	1809101081
	1809101083
	1809101904
	1909101511
	1909101513
	1909101515
	2100101909
	2109101904
	2109101908
	2109101916
	2109101917
	2109101920
	2209101906
